# Supplementary material for: Neutral species from “non-protic” N-heterocyclic ionic liquids
Source: Royal Society of Chemistry journal article supplement (doi:10.1039/c1ob00007a), 2011-01-01
Supplement: c1ob00007a.pdf [file c1ob00007a.pdf]

# Neutral species from “non-protic” N-heterocyclic ionic liquids<sup>†</sup>

## Supporting information

**Oldamur Hollóczki and László Nyulászi\***

*Budapest University of Technology and Economics, Department of Inorganic and Analytical Chemistry, Szent Gellért tér 4. Budapest H-1111, Hungary. Tel: +36 1 463 3281; E-mail: nyulaszi@mail.bme.hu  
Materials Structure and Modeling Research Group of the Hungarian Academy of Sciences, Budapest University of Technology and Economics, Szt. Gellért tér 4., Budapest, H-1111, Hungary.*

## Table of contents

|                                                                                                                                                                    |    |
|--------------------------------------------------------------------------------------------------------------------------------------------------------------------|----|
| $\pi$ -orbitals of pyridinium-ylide <b>7</b> .....                                                                                                                 | 3  |
| Detailed discussion of the ISE <sub>c</sub> values of pyridinium-ylide <b>7</b> .....                                                                              | 4  |
| XYZ coordinates and total energies of cations <b>1</b> , <b>3</b> and <b>5</b> at the B3LYP/6-31+G* level .....                                                    | 6  |
| XYZ coordinates and total energies of the deprotonated cations at the B3LYP/6-31+G* level .....                                                                    | 8  |
| XYZ coordinates and total energies of <b>4</b> , <b>7</b> and their rotational transition state at the B3LYP/6-311+G** level .....                                 | 11 |
| XYZ coordinates and total energies of the structures involved in the ISE reactions of <b>4</b> and <b>7</b> at the B3LYP/6-311+G** level.....                      | 13 |
| XYZ coordinates and total energies of the anions at the B3LYP/6-31+G* level .....                                                                                  | 22 |
| XYZ coordinates and total energies of the protonated anions at the B3LYP/6-31+G* level.....                                                                        | 24 |
| XYZ coordinates and total energies of type <b>3a</b> species at the B3LYP/6-31+G* level.....                                                                       | 26 |
| XYZ coordinates and total energies of type <b>3b</b> species at the B3LYP/6-31+G* level.....                                                                       | 35 |
| XYZ coordinates and total energies of type <b>3c</b> species at the B3LYP/6-31+G* level .....                                                                      | 39 |
| XYZ coordinates and total energies of type <b>5a</b> species at the B3LYP/6-31+G* level.....                                                                       | 42 |
| XYZ coordinates and total energies of type <b>5b</b> species at the B3LYP/6-31+G* level.....                                                                       | 51 |
| XYZ coordinates and total energies of type <b>5c</b> species at the B3LYP/6-31+G* level .....                                                                      | 54 |
| XYZ coordinates and total energies of type <b>5d</b> species at the B3LYP/6-31+G* level.....                                                                       | 58 |
| XYZ coordinates and total energies of type <b>5e</b> species at the B3LYP/6-31+G* level .....                                                                      | 65 |
| Structure, relative stability, XYZ coordinates and total energies of alternative H-bonded complexes between acids and the deprotonated <b>3</b> and <b>5</b> ..... | 73 |

**$\pi$ -orbital of pyridinium-ylide 7**

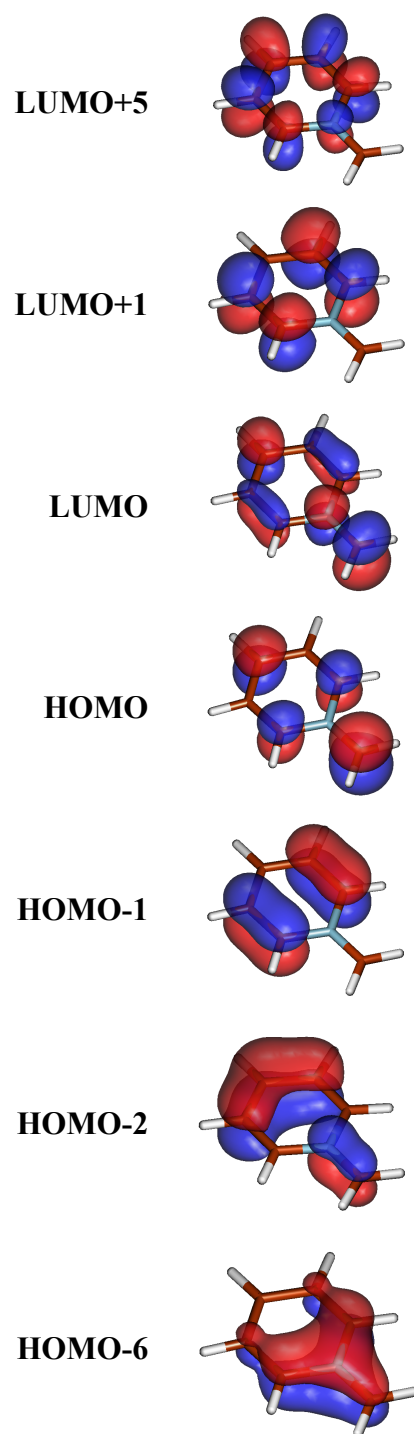

**Scheme S1.**  $\pi$ -orbitals of pyridinium-ylide 7.

## Detailed discussion of the ISE<sub>c</sub> values of pyridinium-ylide 7

ISE reactions for **7** (**Scheme S2.**) have been constructed according to the analogue reactions for pyridine.<sup>1</sup>

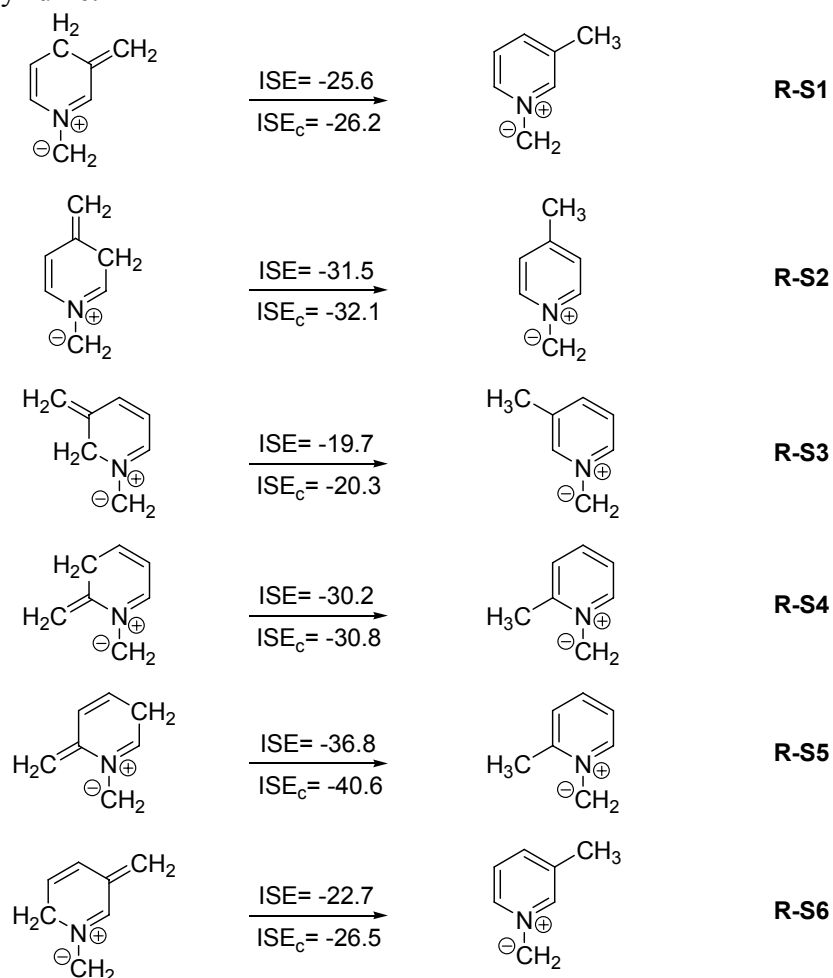

**Scheme S2.** ISE reactions for **7**, their energies (ISE) and the corrected values (ISE<sub>c</sub>) in kcal mol<sup>-1</sup>

In order to cancel out the *anti-syn* mismatches (similarly to the case of pyridine),<sup>1</sup> the energies of the reactions **R-S1** – **R-S4** in **Scheme S2** have been corrected with the energy of reaction **R-S7**, while reactions **R-S5** and **R-S6** have been corrected with the energy of reaction **R-S8** (**Scheme S3**).

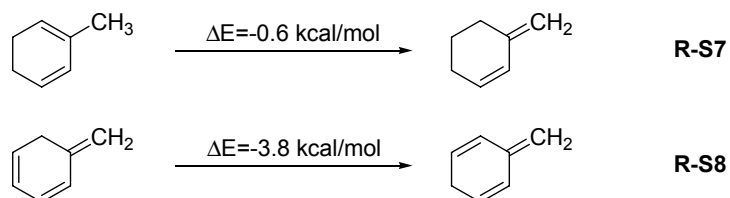

**Scheme S3.**

In the substrate of reactions **R-S4** and **R-S5** the two methylene moieties are bent out of the ring plane, due to steric repulsion. This destabilizing interaction results in the overestimation

<sup>1</sup> P. v. R. Schleyer, and F. Pühlhofer, *Org. Lett.* 2002, **4**, 2873-2876.

of aromaticity, hence these two reactions should be excluded for further discussion. However, the remaining reactions also scatter significantly, which can partly be attributed to the different stabilizing effect of the C=C-N=C and C=C-C=N units in the substrates. To evaluate the extent of this error reaction **R-S9** has been investigated (**Scheme S4**).

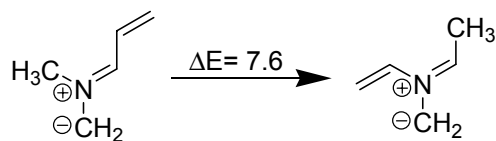

**Scheme S4.**

Apparently, type C=C-C=N conjugation provides higher stability for the substrate of reactions **R-S3** and **R-S6**, resulting in lower ISE values.

**XYZ coordinates and total energies of cations 1, 3 and 5 at the B3LYP/6-31+G\* level**

**1**

E(B3LYP/6-31+G\*) = -305.235160

|   |           |           |           |
|---|-----------|-----------|-----------|
| C | 1.367145  | 0.116034  | 1.794736  |
| N | 0.056328  | -0.011290 | 1.371402  |
| C | 0.049697  | -0.086151 | 0.034306  |
| N | 1.310166  | -0.011334 | -0.411801 |
| C | 2.152034  | 0.116035  | 0.678521  |
| C | -1.127729 | -0.056524 | 2.244303  |
| C | 1.731068  | -0.056634 | -1.821372 |
| H | 0.847131  | -0.161231 | -2.451408 |
| H | 2.251224  | 0.869718  | -2.073911 |
| H | 2.391499  | -0.912654 | -1.974780 |
| H | -2.019643 | -0.161169 | 1.625614  |
| H | -1.048718 | -0.912493 | 2.917765  |
| H | -1.189461 | 0.869864  | 2.819166  |
| H | 3.223335  | 0.194732  | 0.568984  |
| H | 1.626583  | 0.194730  | 2.839911  |
| H | -0.829727 | -0.190127 | -0.584153 |

**3**

E(B3LYP/6-31+G\*) = -344.562477

|   |           |           |           |
|---|-----------|-----------|-----------|
| C | -0.023144 | 0.001218  | -0.149062 |
| N | -0.051742 | -0.031394 | 1.198870  |
| N | 1.271908  | 0.033425  | -0.525217 |
| C | 1.749200  | 0.069040  | -1.914687 |
| C | 2.074831  | 0.020244  | 0.601805  |
| C | -1.260294 | -0.071448 | 2.037208  |
| C | 1.246575  | -0.019919 | 1.680841  |
| H | 1.463996  | -0.041048 | 2.737677  |
| H | 3.152004  | 0.040784  | 0.537727  |
| H | 1.348855  | 0.947592  | -2.426008 |
| H | 2.837385  | 0.128558  | -1.901613 |
| H | 1.445248  | -0.839829 | -2.439783 |
| H | -1.840242 | -0.970875 | 1.819197  |
| H | -0.946922 | -0.095091 | 3.080828  |
| H | -1.866366 | 0.821140  | 1.867363  |
| C | -1.191386 | 0.001685  | -1.072068 |
| H | -2.130050 | -0.027053 | -0.516409 |
| H | -1.196277 | 0.902143  | -1.697582 |
| H | -1.165261 | -0.869172 | -1.737644 |

5

E(B3LYP/6-31+G\*) = -287.978828

|   |           |           |           |
|---|-----------|-----------|-----------|
| C | -0.002704 | -0.003232 | -0.004065 |
| N | -0.004259 | -0.002222 | 1.351041  |
| C | 1.160681  | 0.000750  | 2.045550  |
| C | 2.378529  | 0.004157  | 1.385887  |
| C | 2.398883  | 0.004212  | -0.012087 |
| C | 1.189457  | 0.000212  | -0.711336 |
| C | -1.291895 | -0.048640 | 2.091474  |
| H | 1.076425  | 0.000308  | 3.126375  |
| H | 3.294310  | 0.009347  | 1.967049  |
| H | 3.343382  | 0.009174  | -0.547602 |
| H | 1.159844  | 0.002237  | -1.795551 |
| H | -0.972326 | -0.006626 | -0.488205 |
| H | -2.087134 | 0.325723  | 1.447304  |
| H | -1.501878 | -1.081303 | 2.381406  |
| H | -1.216506 | 0.582276  | 2.977870  |

**XYZ coordinates and total energies of the deprotonated cations at the  
B3LYP/6-31+G\* level**

**2**

E(B3LYP/6-31+G\*) = -304.809082

|   |           |           |           |
|---|-----------|-----------|-----------|
| C | -0.017511 | -0.094819 | -0.014922 |
| N | 0.070026  | -0.011561 | 1.349372  |
| N | 1.296286  | -0.011555 | -0.393023 |
| C | 1.727434  | -0.054724 | -1.781913 |
| C | 2.162502  | 0.117490  | 0.688306  |
| C | -1.091811 | -0.054700 | 2.224045  |
| C | 1.380299  | 0.117103  | 1.799820  |
| H | 0.835755  | -0.159593 | -2.401178 |
| H | 2.251995  | 0.868331  | -2.054074 |
| H | 2.392328  | -0.908620 | -1.955265 |
| H | -1.975730 | -0.159466 | 1.593738  |
| H | -1.030586 | -0.908652 | 2.908359  |
| H | -1.170868 | 0.868317  | 2.809755  |
| H | 3.234971  | 0.196658  | 0.580992  |
| H | 1.641317  | 0.195821  | 2.845596  |

**4**

E(B3LYP/6-31+G\*) = -344.129408

|   |           |           |           |
|---|-----------|-----------|-----------|
| C | -0.017720 | 0.050114  | -0.027526 |
| N | -0.026674 | -0.027396 | 1.367646  |
| C | 1.280890  | -0.083864 | 1.846268  |
| N | 2.078059  | -0.049109 | 0.703784  |
| C | 1.271856  | 0.036889  | -0.434273 |
| C | 3.518727  | -0.074075 | 0.747284  |
| C | 1.690133  | -0.154082 | 3.146264  |
| C | -1.181918 | -0.026780 | 2.229850  |
| H | 3.908320  | -0.037220 | -0.272930 |
| H | 3.908610  | 0.787155  | 1.307510  |
| H | 3.878682  | -0.992327 | 1.231134  |
| H | -2.085539 | 0.023719  | 1.617572  |
| H | -1.216103 | -0.941539 | 2.837274  |
| H | -1.163926 | 0.837624  | 2.908129  |
| H | -0.932925 | 0.102545  | -0.596989 |
| H | 2.741645  | -0.193831 | 3.398044  |
| H | 0.972719  | -0.175442 | 3.955891  |
| H | 1.695716  | 0.075455  | -1.425989 |



### 3 deprotonated at position 1

E(B3LYP/6-31+G\*) = -344.087737

|   |           |           |           |
|---|-----------|-----------|-----------|
| C | 0.216586  | 0.078332  | 0.201110  |
| N | 0.109029  | -0.002359 | 1.564223  |
| C | 1.384840  | 0.043612  | 2.102099  |
| N | 2.280881  | 0.106162  | 1.081401  |
| C | 1.546063  | 0.153753  | -0.109752 |
| C | 3.660864  | 0.010156  | 1.184268  |
| C | 1.786878  | -0.168337 | 3.509281  |
| C | -1.122928 | -0.030005 | 2.326959  |
| H | 4.184620  | 0.310513  | 0.283642  |
| H | 4.070105  | 0.347669  | 2.129520  |
| H | -1.963258 | -0.037508 | 1.629638  |
| H | -1.180909 | -0.930048 | 2.949809  |
| H | -1.206870 | 0.853722  | 2.971533  |
| H | -0.651792 | 0.097355  | -0.440105 |
| H | 2.464519  | -1.037855 | 3.577703  |
| H | 2.343606  | 0.690466  | 3.914780  |
| H | 0.922136  | -0.343028 | 4.155604  |
| H | 2.042824  | 0.208558  | -1.065060 |

### 3 deprotonated at position 4

E(B3LYP/6-31+G\*) = -344.100516

|   |           |           |           |
|---|-----------|-----------|-----------|
| N | -0.088648 | -0.004824 | 0.167340  |
| C | -0.126263 | 0.010496  | 1.520111  |
| N | 1.153929  | 0.011184  | 1.932790  |
| C | 1.219438  | -0.012552 | -0.368439 |
| C | 1.970691  | -0.003575 | 0.791833  |
| C | 1.611511  | 0.009932  | 3.315771  |
| C | -1.285111 | -0.007437 | -0.664983 |
| H | -0.944665 | -0.066393 | -1.698672 |
| H | -1.922234 | -0.870621 | -0.439114 |
| H | -1.866098 | 0.912379  | -0.526388 |
| H | 2.701983  | 0.056445  | 3.310020  |
| H | 1.229894  | 0.881060  | 3.858577  |
| H | 1.302953  | -0.904041 | 3.834454  |
| H | 3.044425  | -0.002630 | 0.922494  |
| C | -1.341331 | -0.001088 | 2.386258  |
| H | -2.070087 | 0.748469  | 2.055461  |
| H | -1.846792 | -0.977064 | 2.368235  |
| H | -1.088081 | 0.220260  | 3.427143  |

## 6

E(B3LYP/6-31+G\*) = -287.535985

|   |           |           |           |
|---|-----------|-----------|-----------|
| C | -0.103469 | 0.056836  | -0.054727 |
| N | -0.003669 | -0.013437 | 1.314089  |
| C | 1.157608  | -0.067411 | 2.038032  |
| C | 2.374711  | -0.053867 | 1.401905  |
| C | 2.383010  | 0.016740  | -0.005786 |
| C | 1.177527  | 0.069130  | -0.685705 |
| C | -1.260096 | -0.033334 | 2.089402  |
| H | 1.062379  | -0.120306 | 3.118890  |
| H | 3.290645  | -0.096896 | 1.982185  |
| H | 3.331809  | 0.029227  | -0.539708 |
| H | 1.188604  | 0.123551  | -1.772437 |
| H | -2.076993 | 0.015103  | 1.371885  |
| H | -1.328040 | -0.956766 | 2.674669  |
| H | -1.300963 | 0.828429  | 2.764364  |

## 7

E(B3LYP/6-31+G\*) = -287.544686

|   |           |           |           |
|---|-----------|-----------|-----------|
| C | 0.007284  | 0.037654  | -0.090979 |
| N | -0.100099 | -0.089983 | 1.297608  |
| C | 1.107247  | -0.148368 | 2.001017  |
| C | 2.329226  | -0.084440 | 1.368225  |
| C | 2.434723  | 0.043391  | -0.023354 |
| C | 1.225934  | 0.102114  | -0.730051 |
| C | -1.289153 | -0.152617 | 1.917211  |
| H | 1.002390  | -0.247142 | 3.074093  |
| H | 3.216504  | -0.137270 | 1.993535  |
| H | 3.394650  | 0.093922  | -0.523617 |
| H | 1.215431  | 0.201095  | -1.812252 |
| H | -0.938247 | 0.081125  | -0.616641 |
| H | -2.188648 | -0.102510 | 1.322672  |
| H | -1.311016 | -0.250791 | 2.991905  |

**XYZ coordinates and total energies of 4, 7 and their rotational transition state at the B3LYP/6-311+G\*\* level**

**4**

E(B3LYP/6-311+G\*\*) = -344.213323  
C -0.095826 0.087533 -0.139201  
N -0.065207 -0.004473 1.249402  
N 1.242064 0.065549 -0.522782  
C 1.671160 0.135447 -1.897420  
C 2.057184 -0.041203 0.605933  
C -1.252876 -0.021898 2.066535  
C 1.257346 -0.084107 1.690194  
H 1.503388 -0.161894 2.734876  
H 3.130037 -0.074758 0.529730  
H 1.331532 1.066187 -2.365764  
H 2.759938 0.101226 -1.934514  
H 1.271826 -0.705997 -2.475130  
H -1.890205 -0.876538 1.812269  
H -0.964737 -0.098590 3.114901  
H -1.836123 0.895435 1.927515  
C -1.190053 0.177630 -0.942755  
H -2.184733 0.185403 -0.525042  
H -1.086136 0.244211 -2.014527

**4 (rotational TS)**

E(B3LYP/6-311+G\*\*) = -344.168262  
C 0.016388 0.249242 0.016112  
N 0.052675 0.052015 1.379960  
C 1.346229 -0.074565 1.835735  
N 2.103029 0.054598 0.684567  
C 1.302080 0.251070 -0.421429  
C 1.726492 -0.287045 3.192630  
C -1.108630 -0.018750 2.257355  
C 3.555325 -0.011228 0.664354  
H -0.904156 0.370898 -0.528451  
H 1.698745 0.374705 -1.415013  
H 3.876803 -0.173952 1.693835  
H 3.890659 -0.839404 0.036345  
H 3.974147 0.924983 0.289109  
H -1.669602 0.917197 2.215929  
H -1.753205 -0.849510 1.962798  
H -0.699147 -0.181657 3.258833  
H 2.194585 -1.253862 3.383446  
H 2.279487 0.539892 3.640552

7

E(B3LYP/6-311+G\*\*) = -287.612090

|   |           |           |           |
|---|-----------|-----------|-----------|
| C | 0.008536  | 0.037635  | -0.090357 |
| N | -0.098268 | -0.089967 | 1.296708  |
| C | 1.107416  | -0.148247 | 1.999627  |
| C | 2.325145  | -0.084308 | 1.367508  |
| C | 2.429533  | 0.043079  | -0.020633 |
| C | 1.224175  | 0.101674  | -0.726307 |
| C | -1.285605 | -0.152526 | 1.915331  |
| H | 1.004614  | -0.247108 | 3.070090  |
| H | 3.211046  | -0.136843 | 1.989928  |
| H | 3.386701  | 0.093651  | -0.519489 |
| H | 1.215338  | 0.200373  | -1.805735 |
| H | -0.933766 | 0.081177  | -0.616081 |
| H | -2.182060 | -0.102337 | 1.321728  |
| H | -1.306577 | -0.250073 | 2.987055  |

**7 (rotational TS)**

E(B3LYP/6-311+G\*\*) = -287.567292

|   |           |           |           |
|---|-----------|-----------|-----------|
| C | 0.011398  | -0.010226 | -0.003935 |
| N | -0.017668 | -0.018404 | 1.349765  |
| C | 1.147660  | -0.012101 | 2.023842  |
| C | 2.374417  | 0.002679  | 1.371843  |
| C | 2.406908  | 0.011415  | -0.017501 |
| C | 1.199905  | 0.004605  | -0.714886 |
| C | -1.288193 | -0.034119 | 2.179447  |
| H | 1.016941  | -0.019394 | 3.097248  |
| H | 3.283842  | 0.007137  | 1.958575  |
| H | 3.350734  | 0.023512  | -0.549517 |
| H | 1.173233  | 0.011052  | -1.797322 |
| H | -0.958805 | -0.015958 | -0.480595 |
| H | -1.847842 | 0.844434  | 1.823418  |
| H | -1.830895 | -0.919652 | 1.814451  |

**XYZ coordinates and total energies of the structures involved in the ISE reactions of 4 and 7 at the B3LYP/6-311+G\*\* level**

**Substrate of the ISE reaction of 4**

E(B3LYP/6-311+G\*\*) = -383.536684

|   |           |           |           |
|---|-----------|-----------|-----------|
| C | -0.077265 | 0.039916  | -0.017632 |
| N | 0.002250  | 0.323066  | 1.413328  |
| C | 1.295118  | 0.052340  | 1.864438  |
| N | 2.110789  | 0.014093  | 0.726095  |
| C | 1.372636  | 0.033095  | -0.447589 |
| C | 1.692880  | -0.133230 | 3.138975  |
| C | -1.143485 | 0.007593  | 2.239235  |
| C | 3.553930  | -0.023734 | 0.756081  |
| H | -0.665167 | 0.795834  | -0.545029 |
| C | 1.834161  | 0.019611  | -1.706905 |
| H | 3.908052  | 0.352141  | 1.714790  |
| H | 3.940093  | -1.038517 | 0.604619  |
| H | 3.950920  | 0.622486  | -0.030993 |
| H | -1.061565 | 0.510120  | 3.204021  |
| H | -2.045887 | 0.377773  | 1.748807  |
| H | -1.253878 | -1.073793 | 2.415559  |
| H | 0.989305  | -0.072368 | 3.954447  |
| H | 2.724599  | -0.333827 | 3.381940  |
| H | 1.139915  | 0.054346  | -2.535300 |
| H | 2.888114  | -0.036372 | -1.941117 |
| H | -0.534379 | -0.944968 | -0.208068 |

**Product of the ISE reaction of 4**

E(B3LYP/6-311+G\*\*) = -383.542996

|   |           |           |           |
|---|-----------|-----------|-----------|
| C | 0.005093  | -0.026422 | 0.011258  |
| N | 0.002330  | -0.014953 | 1.409945  |
| C | 1.308281  | 0.008992  | 1.878845  |
| N | 2.098007  | 0.007657  | 0.731008  |
| C | 1.285684  | -0.012620 | -0.415981 |
| C | 1.728238  | 0.030198  | 3.173476  |
| C | -1.151240 | -0.017530 | 2.273343  |
| C | 3.539168  | 0.033819  | 0.790378  |
| H | -0.909694 | -0.044637 | -0.556083 |
| C | 1.833321  | -0.019007 | -1.801023 |
| H | 3.921547  | -0.839906 | 1.330723  |
| H | 3.948867  | 0.026744  | -0.218351 |
| H | 3.891014  | 0.934861  | 1.306309  |
| H | -1.173361 | 0.879892  | 2.902658  |
| H | -2.054031 | -0.039123 | 1.662873  |
| H | -1.149013 | -0.896098 | 2.928901  |
| H | 1.017311  | 0.028803  | 3.985114  |
| H | 2.778986  | 0.047838  | 3.416502  |
| H | 1.010860  | -0.036923 | -2.517742 |
| H | 2.438068  | 0.870684  | -2.010128 |
| H | 2.461160  | -0.896650 | -1.992524 |

### Substrate of reaction R-S1

E(B3LYP/6-311+G\*\*) = -326.899604

|   |           |           |           |
|---|-----------|-----------|-----------|
| C | -0.118150 | 0.133836  | -0.016139 |
| C | -0.040484 | 0.096495  | 1.407023  |
| N | 1.113054  | 0.049195  | 2.108509  |
| C | 2.357457  | 0.035627  | 1.384148  |
| C | 2.402096  | 0.056365  | 0.059060  |
| C | 1.182022  | 0.091495  | -0.806280 |
| C | 1.223560  | 0.015101  | 3.447331  |
| H | 3.231204  | 0.007809  | 2.017232  |
| H | 3.375643  | 0.043558  | -0.419057 |
| H | 1.241655  | 0.958751  | -1.474506 |
| C | -1.303871 | 0.200458  | -0.671309 |
| H | 0.326377  | 0.022503  | 4.044198  |
| H | 2.204525  | -0.020459 | 3.885717  |
| H | -1.348057 | 0.227033  | -1.753181 |
| H | -2.245958 | 0.228216  | -0.136792 |
| H | -0.942692 | 0.112443  | 2.003039  |
| H | 1.189041  | -0.785539 | -1.465167 |

### Product of reaction R-S1, R-S3 and R-S6

E(B3LYP/6-311+G\*\*) = -326.940380

|   |           |           |           |
|---|-----------|-----------|-----------|
| C | -0.002258 | -0.010921 | 0.012111  |
| C | 0.024760  | 0.046144  | 1.387405  |
| N | 1.209117  | 0.036658  | 2.128952  |
| C | 2.392723  | -0.035111 | 1.395798  |
| C | 2.385961  | -0.092779 | 0.023091  |
| C | 1.199742  | -0.082838 | -0.710887 |
| C | 1.203210  | 0.093559  | 3.468480  |
| H | 3.297316  | -0.041422 | 1.985156  |
| H | 3.346061  | -0.147012 | -0.477393 |
| H | 1.202679  | -0.128592 | -1.791826 |
| C | -1.333437 | 0.005101  | -0.697871 |
| H | -0.875581 | 0.102183  | 1.982311  |
| H | 0.258166  | 0.147634  | 3.980781  |
| H | 2.144189  | 0.082951  | 3.990936  |
| H | -1.400376 | 0.862056  | -1.374493 |
| H | -1.460466 | -0.898188 | -1.301670 |
| H | -2.167509 | 0.062648  | 0.004006  |

### Substrate of reaction R-S2

E(B3LYP/6-311+G\*\*) = -326.888045

|   |           |           |           |
|---|-----------|-----------|-----------|
| C | -0.120910 | 0.092598  | -0.022643 |
| C | -0.034819 | -0.113221 | 1.474624  |
| C | 1.296634  | 0.088100  | 2.030076  |
| C | 2.390196  | 0.144205  | 1.263663  |
| N | 2.347429  | -0.054081 | -0.159163 |
| C | 1.152455  | -0.258953 | -0.731232 |
| C | -1.087140 | -0.412742 | 2.248576  |
| C | 3.556381  | -0.030683 | -0.769324 |
| H | -0.944785 | -0.492665 | -0.439324 |
| H | 1.413902  | 0.180279  | 3.104286  |
| H | 3.383772  | 0.307791  | 1.651551  |
| H | 4.437664  | -0.104262 | -0.156368 |
| H | 3.591201  | -0.185216 | -1.835890 |
| H | -0.989477 | -0.498669 | 3.325459  |
| H | -2.072485 | -0.579992 | 1.828545  |
| H | 1.160971  | -0.441888 | -1.796265 |
| H | -0.389500 | 1.152927  | -0.194187 |

### Product of reaction R-S2

E(B3LYP/6-311+G\*\*) = -326.938276

|   |           |           |           |
|---|-----------|-----------|-----------|
| C | 0.006491  | -0.012935 | 0.023565  |
| C | 0.004209  | -0.004641 | 1.398707  |
| N | 1.181708  | 0.003303  | 2.143920  |
| C | 2.362162  | -0.004350 | 1.401379  |
| C | 2.364426  | -0.012741 | 0.027861  |
| C | 1.185682  | -0.015601 | -0.731319 |
| C | 1.181866  | 0.012634  | 3.487379  |
| H | 3.269039  | -0.006191 | 1.987983  |
| H | 3.332795  | -0.019080 | -0.461952 |
| C | 1.191638  | 0.010329  | -2.236938 |
| H | -0.960070 | -0.019468 | -0.469518 |
| H | -0.904715 | -0.006749 | 1.982044  |
| H | 0.237980  | 0.014899  | 4.004407  |
| H | 2.125841  | 0.015007  | 4.004188  |
| H | 0.235544  | -0.331853 | -2.641030 |
| H | 1.368022  | 1.019279  | -2.630074 |
| H | 1.973540  | -0.636066 | -2.646928 |

### Substrate of reaction R-S3

E(B3LYP/6-311+G\*\*) = -326.908950

|   |           |           |           |
|---|-----------|-----------|-----------|
| C | -0.038583 | 0.126938  | -0.056158 |
| C | -0.023553 | -0.277713 | 1.404823  |
| N | 1.249470  | 0.036154  | 2.129984  |
| C | 2.392650  | -0.100280 | 1.413592  |
| C | 2.359597  | -0.176424 | 0.001968  |
| C | 1.219152  | -0.046211 | -0.740796 |
| C | 1.151801  | 0.313252  | 3.426578  |
| H | 3.317446  | -0.035014 | 1.968427  |
| H | 3.318100  | -0.283451 | -0.493959 |
| H | 1.254068  | -0.004229 | -1.822091 |
| C | -1.196646 | 0.517134  | -0.623822 |
| H | -0.841415 | 0.179866  | 1.956748  |
| H | 0.178602  | 0.333926  | 3.886206  |
| H | 2.053583  | 0.476580  | 3.996414  |
| H | -1.259440 | 0.705661  | -1.689298 |
| H | -2.104265 | 0.645800  | -0.045527 |
| H | -0.124182 | -1.366779 | 1.467107  |

### Substrate of reaction R-S4

E(B3LYP/6-311+G\*\*) = -326.894567

|   |           |           |           |
|---|-----------|-----------|-----------|
| C | -0.026928 | -0.389798 | -0.031774 |
| C | -0.046923 | 0.129246  | 1.379531  |
| N | 1.200257  | -0.082601 | 2.119376  |
| C | 2.343094  | 0.076947  | 1.399551  |
| C | 2.322884  | 0.268476  | -0.012999 |
| C | 1.211191  | 0.080942  | -0.756643 |
| C | 1.127367  | -0.332856 | 3.433227  |
| H | 3.263602  | 0.027029  | 1.962673  |
| H | 3.264272  | 0.540291  | -0.478575 |
| H | 1.199237  | 0.192425  | -1.832476 |
| H | -0.041003 | -1.492764 | -0.006435 |
| C | -1.056801 | 0.792741  | 1.936049  |
| H | 0.166842  | -0.517240 | 3.876884  |
| H | 2.046420  | -0.420283 | 3.990756  |
| H | -1.962586 | 0.955473  | 1.365554  |
| H | -1.013292 | 1.197450  | 2.937013  |
| H | -0.944953 | -0.075831 | -0.531316 |



### Product of reaction R-S4 and R-S5

E(B3LYP/6-311+G\*\*) = -326.942678

|   |           |           |           |
|---|-----------|-----------|-----------|
| C | 0.022935  | 0.020075  | -0.003946 |
| C | -0.009941 | 0.005559  | 1.378702  |
| N | 1.191406  | -0.011073 | 2.108203  |
| C | 2.378005  | -0.012252 | 1.370149  |
| C | 2.395394  | 0.002159  | 0.000788  |
| C | 1.207307  | 0.019013  | -0.737040 |
| C | 1.224562  | -0.024930 | 3.453671  |
| H | 3.277682  | -0.025217 | 1.967433  |
| H | 3.361751  | 0.000137  | -0.489689 |
| H | 1.205878  | 0.030306  | -1.817891 |
| H | -0.933617 | 0.032681  | -0.514142 |
| C | -1.276892 | 0.007200  | 2.163908  |
| H | 0.313238  | -0.025667 | 4.017945  |
| H | 2.188553  | -0.038692 | 3.933059  |
| H | -2.133088 | 0.020279  | 1.489693  |
| H | -1.356343 | -0.880014 | 2.806126  |
| H | -1.342923 | 0.882487  | 2.823775  |

### Substrate of reaction R-S5

E(B3LYP/6-311+G\*\*) = -326.884057

|   |           |           |           |
|---|-----------|-----------|-----------|
| C | -0.017434 | 0.039268  | -0.050485 |
| C | -0.057313 | 0.126956  | 1.403938  |
| N | 1.219875  | 0.056530  | 2.118749  |
| C | 2.344046  | -0.054027 | 1.384163  |
| C | 2.429992  | 0.126690  | -0.088711 |
| C | 1.108170  | 0.059981  | -0.769196 |
| C | 1.209054  | 0.105198  | 3.468978  |
| H | 3.251119  | -0.182075 | 1.958111  |
| H | 3.101274  | -0.637757 | -0.505901 |
| H | 1.076873  | 0.050892  | -1.852956 |
| H | -0.986439 | 0.014135  | -0.536178 |
| C | -1.216833 | 0.302967  | 2.052047  |
| H | 0.313905  | -0.159183 | 3.998590  |
| H | 2.167524  | 0.073123  | 3.963104  |
| H | -2.132376 | 0.332141  | 1.475966  |
| H | -1.299147 | 0.448499  | 3.116522  |
| H | 2.912948  | 1.086669  | -0.352707 |

### Substrate of reaction R-S6

E(B3LYP/6-311+G\*\*) = -326.904226

|   |           |           |           |
|---|-----------|-----------|-----------|
| C | 0.005952  | -0.044081 | -0.003159 |
| C | 0.004063  | -0.011108 | 1.329544  |
| C | 1.260690  | -0.015165 | 2.082379  |
| C | 2.472134  | -0.003000 | 1.323737  |
| N | 2.525422  | 0.017295  | -0.023645 |
| C | 1.261546  | -0.107218 | -0.812188 |
| C | 1.239022  | -0.019907 | 3.441881  |
| C | 3.635575  | 0.109016  | -0.763628 |
| H | 1.322303  | -1.057745 | -1.353494 |
| H | -0.916767 | -0.044499 | -0.573803 |
| H | -0.925978 | 0.022518  | 1.885516  |
| H | 4.590915  | 0.177485  | -0.268605 |
| H | 3.549093  | 0.075219  | -1.835869 |
| H | 0.300746  | -0.020748 | 3.981530  |
| H | 2.150391  | -0.023750 | 4.027728  |
| H | 3.430224  | 0.041605  | 1.824172  |
| H | 1.279566  | 0.689554  | -1.561080 |

### Substrate of reaction R-S7

E(B3LYP/6-311+G\*\*) = -272.812813

|   |           |           |           |
|---|-----------|-----------|-----------|
| C | 0.114701  | -0.223773 | -0.445111 |
| C | 0.297316  | -0.407132 | 1.038222  |
| C | 1.332328  | 0.109455  | 1.721473  |
| C | 1.441810  | -0.052325 | 3.219290  |
| H | 2.079374  | 0.709747  | 1.209795  |
| C | 0.809948  | -1.367766 | 3.698665  |
| H | 2.487070  | -0.000871 | 3.537028  |
| H | 0.933418  | 0.796301  | 3.703902  |
| C | -0.510071 | -1.623154 | 3.013915  |
| H | 1.486243  | -2.207676 | 3.474527  |
| H | 0.688502  | -1.356345 | 4.785514  |
| C | -0.725883 | -1.175055 | 1.769293  |
| H | -1.258808 | -2.222022 | 3.523003  |
| H | -1.660149 | -1.395875 | 1.260749  |
| H | -0.833327 | 0.281057  | -0.663787 |
| H | 0.922926  | 0.369842  | -0.877087 |
| H | 0.086509  | -1.189343 | -0.962390 |

### Product of reaction R-S7

E(B3LYP/6-311+G\*\*) = -272.813754

|   |           |           |           |
|---|-----------|-----------|-----------|
| C | -0.147005 | 0.245271  | -0.235389 |
| C | 0.211445  | -0.294332 | 0.939033  |
| C | 1.543748  | -0.004150 | 1.600237  |
| C | 1.414250  | 0.047321  | 3.129792  |
| H | 2.245502  | -0.805768 | 1.331983  |
| C | 0.817770  | -1.257734 | 3.675217  |
| H | 2.389376  | 0.240463  | 3.586634  |
| H | 0.760377  | 0.882312  | 3.405269  |
| C | -0.382918 | -1.697410 | 2.879720  |
| H | 1.575756  | -2.054573 | 3.661579  |
| H | 0.538265  | -1.136926 | 4.727700  |
| C | -0.658271 | -1.233881 | 1.650751  |
| H | -1.054128 | -2.416441 | 3.341146  |
| H | -1.560306 | -1.559761 | 1.140179  |
| H | -1.092962 | -0.002920 | -0.705204 |
| H | 0.494004  | 0.945091  | -0.760199 |
| H | 1.964078  | 0.926833  | 1.210885  |

### Substrate of reaction R-S8

E(B3LYP/6-311+G\*\*) = -271.584870

|   |           |           |           |
|---|-----------|-----------|-----------|
| C | -0.033294 | 0.089384  | -0.005177 |
| C | -0.053347 | 0.105344  | 1.517262  |
| C | 1.243617  | 0.116047  | 2.188295  |
| C | 2.383299  | 0.394953  | 1.522511  |
| C | 2.371384  | 0.708402  | 0.096708  |
| C | 1.244670  | 0.598010  | -0.620353 |
| C | -1.202455 | 0.091416  | 2.213512  |
| H | 1.259978  | -0.052759 | 3.260391  |
| H | 3.328247  | 0.430176  | 2.053784  |
| H | 3.293075  | 1.037290  | -0.371090 |
| H | 1.237165  | 0.824165  | -1.681712 |
| H | -0.895576 | 0.634325  | -0.401450 |
| H | -1.201781 | 0.043780  | 3.296895  |
| H | -2.169187 | 0.124729  | 1.723232  |
| H | -0.169201 | -0.951145 | -0.341723 |

### Product of reaction R-S8

E(B3LYP/6-311+G\*\*) = -271.590882

|   |           |           |           |
|---|-----------|-----------|-----------|
| C | -0.004590 | 0.001855  | -0.010570 |
| C | -0.010542 | -0.103454 | 1.451684  |
| C | 1.290832  | -0.344569 | 2.082151  |
| C | 2.421801  | -0.462646 | 1.374753  |
| C | 2.463549  | -0.359335 | -0.122278 |
| C | 1.115583  | -0.112923 | -0.735302 |
| C | -1.143439 | 0.013521  | 2.172262  |
| H | 3.363080  | -0.641386 | 1.886009  |
| H | 3.160667  | 0.438619  | -0.421418 |
| H | 2.904261  | -1.274524 | -0.547099 |
| H | 1.070948  | -0.027259 | -1.816983 |
| H | -0.955980 | 0.180129  | -0.502646 |
| H | -2.100696 | 0.191277  | 1.695815  |
| H | -1.136761 | -0.066455 | 3.253245  |
| H | 1.314177  | -0.427095 | 3.164609  |

### Substrate of reaction R-S9

E(B3LYP/6-311+G\*\*) = -250.684770

|   |           |           |           |
|---|-----------|-----------|-----------|
| N | 0.177171  | -0.339630 | 0.049227  |
| C | 0.013572  | -0.127654 | 1.504428  |
| C | 1.391481  | -0.014943 | -0.450779 |
| C | -0.873648 | -0.881564 | -0.576183 |
| H | -1.028266 | 0.106104  | 1.715044  |
| H | 0.300692  | -1.035179 | 2.037105  |
| H | 0.639913  | 0.703752  | 1.820942  |
| H | -0.796637 | -1.172638 | -1.609167 |
| H | -1.790119 | -1.003692 | -0.025970 |
| C | 1.742143  | -0.126450 | -1.825745 |
| H | 2.113003  | 0.333336  | 0.273209  |
| C | 2.975646  | 0.076727  | -2.339681 |
| H | 0.943957  | -0.373039 | -2.521652 |
| H | 3.154885  | 0.013013  | -3.404964 |
| H | 3.826203  | 0.314591  | -1.709244 |

**Product of reaction R-S9**

E(B3LYP/6-311+G\*\*) = -250.672728

|   |           |           |           |
|---|-----------|-----------|-----------|
| C | 0.329561  | -0.058075 | -0.002488 |
| N | 0.464358  | -0.585456 | 1.234518  |
| C | 1.519242  | -0.008084 | 2.033828  |
| C | 1.421337  | 0.245672  | 3.331211  |
| C | -0.269948 | -1.569642 | 1.775791  |
| C | -1.383601 | -2.161720 | 1.000250  |
| H | 0.915828  | 0.809775  | -0.249166 |
| H | -0.432088 | -0.437480 | -0.659510 |
| H | 0.083632  | -1.981062 | 2.705706  |
| H | -1.895556 | -2.926119 | 1.586192  |
| H | -2.122615 | -1.400808 | 0.703393  |
| H | -1.037958 | -2.630136 | 0.062287  |
| H | 2.405439  | 0.220930  | 1.455882  |
| H | 2.267180  | 0.670771  | 3.856412  |
| H | 0.518158  | 0.049900  | 3.894249  |

### XYZ coordinates and total energies of the anions at the B3LYP/6-31+G\* level

#### **CF<sub>3</sub>SO<sub>3</sub><sup>-</sup>**

E(B3LYP/6-31+G\*)= -961.553353

|   |           |           |           |
|---|-----------|-----------|-----------|
| S | 0.000000  | 0.000000  | -0.169887 |
| C | 0.000000  | 0.000000  | 1.722755  |
| F | 1.257383  | 0.000000  | 2.230901  |
| F | -0.628691 | 1.088926  | 2.230901  |
| F | -0.628691 | -1.088926 | 2.230901  |
| O | -1.447908 | 0.000000  | -0.485191 |
| O | 0.723954  | 1.253925  | -0.485191 |
| O | 0.723954  | -1.253925 | -0.485191 |

#### **Cl<sup>-</sup>**

E(B3LYP/6-31+G\*)= -460.2747235

#### **ClCH<sub>2</sub>COO<sup>-</sup>**

E(B3LYP/6-31+G\*)= -688.147116

|    |           |           |           |
|----|-----------|-----------|-----------|
| C  | 0.013677  | -0.003490 | -0.144203 |
| C  | -0.115455 | -0.004677 | 1.415241  |
| H  | 0.716993  | -0.556973 | 1.853882  |
| Cl | -0.116249 | 1.636104  | 2.284350  |
| H  | -1.053133 | -0.480179 | 1.706964  |
| O  | -0.005110 | -1.198933 | -0.550256 |
| O  | 0.112680  | 1.069911  | -0.766643 |

#### **CH<sub>3</sub>COO<sup>-</sup>**

E(B3LYP/6-31+G\*)= -228.539310

|   |           |           |           |
|---|-----------|-----------|-----------|
| C | -0.022500 | -0.022240 | -0.104414 |
| C | -0.004476 | -0.023851 | 1.459059  |
| H | 1.022469  | 0.007166  | 1.844629  |
| H | -0.525314 | 0.875699  | 1.820201  |
| H | -0.532060 | -0.898391 | 1.860533  |
| O | -1.024678 | -0.572024 | -0.639299 |
| O | 0.951559  | 0.555700  | -0.661708 |

#### **SH<sup>-</sup>**

E(B3LYP/6-31+G\*)= -398.827370

|   |          |          |           |
|---|----------|----------|-----------|
| S | 0.000000 | 0.000000 | -0.205450 |
| H | 0.000000 | 0.000000 | 1.155450  |

#### **CN<sup>-</sup>**

E(B3LYP/6-31+G\*)= -92.865429

|   |          |          |          |
|---|----------|----------|----------|
| C | 0.000000 | 0.000000 | 0.128224 |
| N | 0.000000 | 0.000000 | 1.311776 |

#### **F<sup>-</sup>**

E(B3LYP/6-31+G\*)= -99.8596977

**CH<sub>3</sub>O-**

E(B3LYP/6-31+G\*)= -115.111531

|   |           |           |          |
|---|-----------|-----------|----------|
| O | 0.000000  | 0.000000  | 0.010105 |
| C | 0.000000  | 0.000000  | 1.350103 |
| H | 1.030414  | 0.000000  | 1.842931 |
| H | -0.515207 | 0.892365  | 1.842931 |
| H | -0.515207 | -0.892365 | 1.842931 |

**OH-**

E(B3LYP/6-31+G\*)= -75.796681

|   |          |          |           |
|---|----------|----------|-----------|
| O | 0.000000 | 0.000000 | -0.012437 |
| H | 0.000000 | 0.000000 | 0.962437  |

**H-**

E(B3LYP/6-31+G\*)= -0.4618167

**XYZ coordinates and total energies of the protonated anions at the B3LYP/6-31+G\* level**

**CF<sub>3</sub>SO<sub>3</sub>H**

E(B3LYP/6-31+G\*)= -962.034482

|   |           |           |           |
|---|-----------|-----------|-----------|
| C | 0.054594  | -0.017084 | -0.009344 |
| F | 0.006584  | 0.046243  | 1.320074  |
| S | 1.840980  | 0.078640  | -0.604867 |
| O | 2.458715  | 1.207143  | 0.056816  |
| O | 2.417559  | -1.271739 | 0.104422  |
| O | 1.819537  | -0.113375 | -2.047499 |
| F | -0.626486 | 1.002372  | -0.533872 |
| F | -0.484217 | -1.172628 | -0.420595 |
| H | 2.367537  | -2.013074 | -0.531456 |

**HCl**

E(B3LYP/6-31+G\*)= -460.798000

|    |          |          |           |
|----|----------|----------|-----------|
| H  | 0.000000 | 0.000000 | -0.141217 |
| Cl | 0.000000 | 0.000000 | 1.149217  |

**ClCH<sub>2</sub>COOH**

E(B3LYP/6-31+G\*)= -688.681150

|    |           |           |           |
|----|-----------|-----------|-----------|
| C  | 0.079891  | -0.042282 | -0.068688 |
| C  | 0.017954  | 0.001548  | 1.446813  |
| H  | 1.012750  | 0.222338  | 1.829014  |
| Cl | -1.107001 | 1.283471  | 2.044190  |
| H  | -0.342349 | -0.952694 | 1.837500  |
| O  | -1.109114 | -0.355290 | -0.623305 |
| O  | 1.091011  | 0.146246  | -0.708135 |
| H  | -0.989404 | -0.360996 | -1.592061 |

**CH<sub>3</sub>COOH**

E(B3LYP/6-31+G\*)= -229.096146

|   |           |           |           |
|---|-----------|-----------|-----------|
| C | 0.083954  | -0.034897 | -0.052155 |
| C | -0.002944 | -0.009464 | 1.451551  |
| H | 0.966377  | 0.265195  | 1.868957  |
| H | -0.764928 | 0.710108  | 1.770044  |
| H | -0.305943 | -0.993504 | 1.825352  |
| O | -1.105832 | -0.373854 | -0.617811 |
| O | 1.068932  | 0.208925  | -0.715981 |
| H | -0.974281 | -0.369872 | -1.584961 |

**H<sub>2</sub>S**

E(B3LYP/6-31+G\*)= -399.387272

|   |           |          |           |
|---|-----------|----------|-----------|
| S | -0.209133 | 0.000000 | -0.146535 |
| H | -0.013146 | 0.000000 | 1.189240  |
| H | 1.115119  | 0.000000 | -0.408372 |



### HCN

E(B3LYP/6-31+G\*)= -93.428617

|   |          |          |           |
|---|----------|----------|-----------|
| C | 0.000000 | 0.000000 | 0.088424  |
| N | 0.000000 | 0.000000 | 1.245960  |
| H | 0.000000 | 0.000000 | -0.983384 |

### HF

E(B3LYP/6-31+G\*)= -100.443376

|   |          |          |          |
|---|----------|----------|----------|
| H | 0.000000 | 0.000000 | 0.035168 |
| F | 0.000000 | 0.000000 | 0.972832 |

### CH<sub>3</sub>OH

E(B3LYP/6-31+G\*)= -115.725194

|   |           |           |           |
|---|-----------|-----------|-----------|
| O | 0.022046  | 0.000000  | 0.013673  |
| C | -0.018460 | 0.000000  | 1.438290  |
| H | 1.020657  | 0.000000  | 1.776007  |
| H | -0.516339 | 0.895824  | 1.836775  |
| H | -0.516339 | -0.895824 | 1.836775  |
| H | -0.884406 | 0.000000  | -0.328186 |

### H<sub>2</sub>O

E(B3LYP/6-31+G\*)= -76.422572

|   |           |          |           |
|---|-----------|----------|-----------|
| O | -0.022110 | 0.000000 | -0.014344 |
| H | 0.012946  | 0.000000 | 0.953818  |
| H | 0.902004  | 0.000000 | -0.305141 |

### H<sub>2</sub>

E(B3LYP/6-31+G\*)= -1.175482

|   |          |          |          |
|---|----------|----------|----------|
| H | 0.000000 | 0.000000 | 0.132545 |
| H | 0.000000 | 0.000000 | 0.875455 |

**XYZ coordinates and total energies of type 3a species at the B3LYP/6-31+G\* level**

**A = CF<sub>3</sub>SO<sub>3</sub><sup>-</sup>**

E(B3LYP/6-31+G\*)= -1306.241999

|   |           |           |           |
|---|-----------|-----------|-----------|
| C | 0.369033  | -0.784771 | 0.096735  |
| N | 0.205442  | -0.298407 | 1.378768  |
| C | 1.346141  | 0.299093  | 1.776522  |
| N | 2.221910  | 0.215145  | 0.756162  |
| C | 1.631107  | -0.463348 | -0.293361 |
| C | -0.950077 | -0.549049 | 2.245828  |
| C | 3.634219  | 0.608047  | 0.814215  |
| O | 1.263560  | -2.175746 | 3.906447  |
| S | 2.421155  | -2.586605 | 3.063709  |
| O | 2.055835  | -3.083642 | 1.717517  |
| C | 3.102104  | -4.095803 | 3.952380  |
| F | 3.476980  | -3.787132 | 5.207782  |
| O | 3.555103  | -1.623481 | 3.085864  |
| F | 2.174767  | -5.069322 | 4.020866  |
| F | 4.175668  | -4.586962 | 3.304929  |
| H | 4.137789  | -0.028113 | 1.547619  |
| H | 4.066286  | 0.454377  | -0.175275 |
| H | 3.721341  | 1.663912  | 1.080807  |
| H | -1.295078 | 0.389047  | 2.687700  |
| H | -1.747851 | -0.972753 | 1.634798  |
| H | -0.649837 | -1.257395 | 3.024197  |
| H | 2.169773  | -0.689340 | -1.199567 |
| H | -0.404490 | -1.345490 | -0.403072 |
| C | 1.562122  | 0.941573  | 3.100316  |
| H | 1.351457  | 0.215928  | 3.892880  |
| H | 2.600288  | 1.255414  | 3.210952  |
| H | 0.909980  | 1.816376  | 3.220227  |

**A = Cl- (isomer 1)**

E(B3LYP/6-31+G\*)= -804.976472

|    |           |           |           |
|----|-----------|-----------|-----------|
| C  | 0.038052  | 0.011117  | 0.021384  |
| N  | 0.047955  | 0.107657  | 1.368819  |
| N  | 1.321169  | 0.064350  | -0.397774 |
| C  | 2.154897  | 0.056220  | 0.708995  |
| C  | 1.361450  | 0.083314  | 1.809947  |
| C  | 1.741774  | -0.237750 | -1.763819 |
| H  | 1.457700  | -1.273301 | -1.984416 |
| H  | 1.271490  | 0.451680  | -2.468886 |
| H  | 2.825037  | -0.122488 | -1.824754 |
| H  | 3.228664  | 0.029538  | 0.611853  |
| H  | 1.608669  | 0.084719  | 2.859702  |
| C  | -1.119869 | -0.140494 | 2.210903  |
| H  | -1.920711 | 0.562477  | 1.970136  |
| H  | -1.445343 | -1.173807 | 2.043185  |
| H  | -0.828695 | -0.001426 | 3.253203  |
| C  | -1.162797 | 0.129111  | -0.850368 |
| H  | -2.027749 | -0.320997 | -0.362967 |
| H  | -1.374210 | 1.185058  | -1.077497 |
| H  | -1.008145 | -0.421696 | -1.778465 |
| Cl | -0.175244 | -2.774949 | -0.065921 |

**A = Cl- (isomer 2)**

E(B3LYP/6-31+G\*)= -804.965968

|    |           |           |           |
|----|-----------|-----------|-----------|
| C  | 0.006925  | 0.115549  | 0.016791  |
| N  | -0.004538 | 0.131702  | 1.406661  |
| C  | 1.269110  | 0.078085  | 1.850952  |
| N  | 2.070934  | 0.025140  | 0.772919  |
| C  | 1.307416  | 0.048232  | -0.383341 |
| C  | 1.698186  | 0.050758  | 3.277079  |
| C  | -1.197810 | 0.204803  | 2.247344  |
| C  | 3.543605  | -0.053370 | 0.783970  |
| Cl | 3.621172  | -0.157776 | -2.607010 |
| H  | 3.954257  | 0.848095  | 1.247007  |
| H  | 3.857547  | -0.942553 | 1.336488  |
| H  | 3.868467  | -0.119308 | -0.266601 |
| H  | 1.815244  | 0.005349  | -1.359922 |
| H  | -0.906368 | 0.153563  | -0.556420 |
| H  | -1.218806 | -0.627946 | 2.955227  |
| H  | -1.228076 | 1.152625  | 2.792936  |
| H  | -2.074464 | 0.140826  | 1.601839  |
| H  | 1.053479  | 0.682696  | 3.895436  |
| H  | 1.667115  | -0.967833 | 3.686547  |
| H  | 2.723427  | 0.416293  | 3.371899  |

**A = Cl- (isomer 3)**

E(B3LYP/6-31+G\*)= -804.954695

|    |           |           |           |
|----|-----------|-----------|-----------|
| C  | 0.022389  | 0.098849  | 0.032534  |
| N  | 0.026599  | 0.132667  | 1.417811  |
| C  | 1.298965  | 0.072559  | 1.866507  |
| N  | 2.096934  | -0.003873 | 0.779646  |
| C  | 1.320147  | 0.013333  | -0.367571 |
| C  | 1.737910  | 0.051597  | 3.290365  |
| C  | -1.171330 | 0.223346  | 2.252972  |
| C  | 3.557455  | -0.087232 | 0.796753  |
| Cl | -0.211305 | 0.027773  | -3.111279 |
| H  | 3.989671  | 0.835436  | 1.194771  |
| H  | 3.884318  | -0.939826 | 1.397593  |
| H  | 3.896477  | -0.224222 | -0.230255 |
| H  | 1.686490  | -0.032553 | -1.386199 |
| H  | -0.855305 | 0.134923  | -0.600901 |
| H  | -1.209597 | -0.610772 | 2.958327  |
| H  | -1.188509 | 1.171910  | 2.797358  |
| H  | -2.040517 | 0.174820  | 1.596772  |
| H  | 1.028903  | 0.591685  | 3.923979  |
| H  | 1.818407  | -0.974131 | 3.675638  |
| H  | 2.715742  | 0.528643  | 3.403691  |

**A = ClCH<sub>2</sub>COO-**

E(B3LYP/6-31+G\*)= -1032.850141

|    |           |           |           |
|----|-----------|-----------|-----------|
| N  | 0.009081  | -0.013630 | -0.109298 |
| C  | -0.105680 | 0.036078  | 1.268398  |
| C  | 1.155563  | 0.061092  | 1.775776  |
| N  | 2.025434  | 0.035016  | 0.699696  |
| C  | 1.314309  | 0.026402  | -0.442646 |
| C  | 3.483181  | 0.179663  | 0.768999  |
| C  | 1.902928  | -0.014011 | -1.805644 |
| C  | -1.095961 | 0.192439  | -1.046805 |
| O  | 0.794478  | 2.626209  | -0.942196 |
| C  | 1.871159  | 3.269092  | -0.942015 |
| C  | 1.867201  | 4.800747  | -1.145506 |
| O  | 3.043500  | 2.814117  | -0.795701 |
| H  | 3.744888  | 1.137069  | 0.301393  |
| H  | 3.774921  | 0.169005  | 1.820264  |
| H  | 3.965899  | -0.655942 | 0.254638  |
| H  | -1.019273 | 1.208643  | -1.443987 |
| H  | -1.053597 | -0.546732 | -1.849936 |
| H  | -2.032791 | 0.067026  | -0.501745 |
| H  | -1.066255 | 0.059289  | 1.758305  |
| H  | 1.510078  | 0.097190  | 2.793749  |
| H  | 2.332833  | 5.280453  | -0.282936 |
| H  | 2.448916  | 5.048233  | -2.035125 |
| Cl | 0.232991  | 5.575339  | -1.356405 |
| H  | 1.134974  | 0.149913  | -2.561786 |
| H  | 2.636477  | 0.795506  | -1.887855 |
| H  | 2.389377  | -0.981263 | -1.992648 |

**A = CH<sub>3</sub>COO- (isomer 1)**

E(B3LYP/6-31+G\*)= -573.252304

|   |           |           |           |
|---|-----------|-----------|-----------|
| N | 0.000240  | -0.000338 | 0.001195  |
| C | 0.001232  | -0.004064 | 1.384655  |
| C | 1.300620  | -0.004981 | 1.784900  |
| N | 2.077636  | 0.007657  | 0.639607  |
| C | 1.273841  | 0.051482  | -0.438917 |
| C | 3.537198  | 0.141575  | 0.592350  |
| C | 1.746253  | 0.046806  | -1.846558 |
| C | -1.172890 | 0.257536  | -0.833463 |
| O | 0.729927  | 2.664534  | -0.823009 |
| C | 1.829295  | 3.292734  | -0.904416 |
| C | 1.763034  | 4.816011  | -1.092955 |
| O | 2.982435  | 2.767792  | -0.872569 |
| H | 3.763161  | 1.107581  | 0.122199  |
| H | 3.913329  | 0.108348  | 1.616128  |
| H | 3.969830  | -0.686882 | 0.024177  |
| H | -1.100250 | 1.283978  | -1.205001 |
| H | -1.215216 | -0.456857 | -1.659043 |
| H | -2.064471 | 0.135722  | -0.216134 |
| H | -0.914897 | 0.003763  | 1.953797  |
| H | 1.739299  | -0.011500 | 2.770170  |
| H | 0.781950  | 5.210575  | -0.811729 |
| H | 2.550547  | 5.308500  | -0.512560 |
| H | 1.942215  | 5.052501  | -2.150246 |
| H | 0.916853  | 0.221097  | -2.532143 |
| H | 2.464222  | 0.867029  | -1.964105 |
| H | 2.221526  | -0.912548 | -2.094738 |

**A = CH<sub>3</sub>COO- (isomer 2)**

E(B3LYP/6-31+G\*)= -573.242036

|   |           |           |           |
|---|-----------|-----------|-----------|
| C | -0.000981 | -0.031017 | 0.018864  |
| N | -0.014118 | 0.039104  | 1.407458  |
| C | 1.259104  | -0.024477 | 1.852238  |
| N | 2.057145  | -0.137313 | 0.775843  |
| C | 1.297266  | -0.142081 | -0.383319 |
| C | 3.526368  | -0.232574 | 0.798877  |
| C | -1.212374 | 0.151642  | 2.236227  |
| O | 2.491460  | -0.484408 | -2.972282 |
| C | 3.558239  | -1.171666 | -2.903885 |
| C | 4.173251  | -1.612017 | -4.240029 |
| O | 4.150289  | -1.511901 | -1.838625 |
| H | -1.206686 | 1.088908  | 2.800035  |
| H | -2.081510 | 0.143798  | 1.577497  |
| H | -1.285299 | -0.693816 | 2.925624  |
| H | 3.832442  | -0.881078 | 1.623367  |
| H | 3.844492  | -0.669861 | -0.166139 |
| H | 3.954057  | 0.766522  | 0.931333  |
| H | 1.764757  | -0.249407 | -1.392184 |
| H | -0.913945 | -0.001641 | -0.555530 |
| C | 1.706229  | 0.002927  | 3.273391  |
| H | 4.485836  | -0.725942 | -4.806909 |
| H | 5.037127  | -2.264562 | -4.085021 |
| H | 3.419923  | -2.129850 | -4.845553 |
| H | 0.906657  | 0.353998  | 3.930044  |
| H | 2.011989  | -0.994534 | 3.614885  |
| H | 2.564362  | 0.671699  | 3.394840  |

**A = CH<sub>3</sub>COO- (isomer 3)**

E(B3LYP/6-31+G\*)= -573.235938

|   |           |           |           |
|---|-----------|-----------|-----------|
| N | -0.009013 | -0.048578 | -0.008291 |
| C | -0.022099 | -0.004605 | 1.379707  |
| C | 1.272480  | 0.024616  | 1.801555  |
| N | 2.054130  | -0.002049 | 0.657510  |
| C | 1.270069  | -0.044531 | -0.440410 |
| C | 3.517374  | 0.011399  | 0.667885  |
| C | -1.198365 | -0.089882 | -0.857210 |
| O | 1.812245  | 0.107917  | 4.592597  |
| C | 0.602359  | 0.102463  | 4.997060  |
| C | 0.401891  | 0.137993  | 6.520548  |
| O | -0.422473 | 0.069621  | 4.260313  |
| H | 3.896069  | 0.905984  | 0.164803  |
| H | 3.837920  | 0.023444  | 1.709955  |
| H | 3.912378  | -0.883121 | 0.178201  |
| H | -1.262892 | 0.810125  | -1.475805 |
| H | -1.184980 | -0.977112 | -1.496049 |
| H | -2.072299 | -0.134649 | -0.206814 |
| H | -0.913977 | 0.004996  | 1.989213  |
| H | 1.653205  | 0.061456  | 2.849141  |
| C | 1.730716  | -0.114785 | -1.855923 |
| H | 0.884964  | -0.734899 | 6.977165  |
| H | 0.889303  | 1.027692  | 6.938097  |
| H | -0.660460 | 0.145408  | 6.781430  |
| H | 0.970291  | 0.281897  | -2.534097 |
| H | 2.643010  | 0.472641  | -1.997813 |
| H | 1.947946  | -1.147296 | -2.162321 |



**A = SH-**

E(B3LYP/6-31+G\*)= -743.531502

|   |           |           |           |
|---|-----------|-----------|-----------|
| C | 0.428426  | -0.732044 | 0.339637  |
| C | 0.280355  | -0.423161 | 1.651137  |
| N | 1.403734  | 0.297687  | 2.040801  |
| C | 2.317619  | 0.268205  | 1.017840  |
| N | 1.643266  | -0.202027 | -0.080607 |
| C | 1.763624  | 0.581427  | 3.422353  |
| C | 2.300428  | -0.538108 | -1.335116 |
| S | 3.715106  | -1.840848 | 1.672361  |
| H | 2.536783  | -0.132045 | 3.736331  |
| H | 2.130705  | 1.606763  | 3.521631  |
| H | 0.873332  | 0.468417  | 4.044189  |
| H | 3.086319  | -1.277319 | -1.131864 |
| H | 1.557073  | -0.957653 | -2.015906 |
| H | 2.730357  | 0.355645  | -1.795872 |
| H | -0.226562 | -1.257010 | -0.338165 |
| H | -0.528390 | -0.627361 | 2.335415  |
| C | 3.453863  | 1.239272  | 0.917460  |
| H | 4.950088  | -1.284710 | 1.681778  |
| H | 4.173582  | 0.908597  | 0.167451  |
| H | 3.078685  | 2.237307  | 0.640491  |
| H | 3.981829  | 1.308967  | 1.869472  |

**A = CN-**

E(B3LYP/6-31+G\*)= -437.566177

|   |           |           |           |
|---|-----------|-----------|-----------|
| C | 0.313654  | -0.546436 | 0.212653  |
| C | 0.231774  | -0.312367 | 1.549245  |
| N | 1.415156  | 0.294754  | 1.930064  |
| C | 2.225584  | 0.385242  | 0.856493  |
| N | 1.546232  | -0.081908 | -0.207942 |
| C | 1.855447  | 0.468925  | 3.314440  |
| C | 2.150395  | -0.358788 | -1.512805 |
| N | 3.699190  | -2.232942 | 0.537246  |
| C | 3.480841  | -2.045310 | 1.683031  |
| H | 2.571943  | -0.332342 | 3.534895  |
| H | 2.309946  | 1.452920  | 3.447784  |
| H | 0.982725  | 0.389925  | 3.964408  |
| H | 2.622102  | 0.543627  | -1.908312 |
| H | 2.885076  | -1.162078 | -1.366501 |
| H | 1.360503  | -0.676856 | -2.194867 |
| H | -0.383327 | -1.007012 | -0.469334 |
| H | -0.549959 | -0.529951 | 2.259537  |
| C | 3.578353  | 1.002755  | 0.820957  |
| H | 4.211288  | 0.464180  | 0.114261  |
| H | 3.516987  | 2.063055  | 0.536678  |
| H | 4.057690  | 0.917459  | 1.796828  |

**A = F-**

E(B3LYP/6-31+G\*)= -444.589135

|   |           |           |           |
|---|-----------|-----------|-----------|
| C | -0.000417 | 0.206033  | 0.035158  |
| N | 0.018795  | 0.111469  | 1.382495  |
| N | 1.255145  | -0.074556 | -0.398290 |
| C | 2.067724  | -0.354330 | 0.692192  |
| C | 1.291726  | -0.230761 | 1.801686  |
| C | 1.669689  | -0.126777 | -1.797274 |
| H | 1.183166  | -0.961330 | -2.309904 |
| H | 1.416529  | 0.808914  | -2.301857 |
| H | 2.751346  | -0.266885 | -1.829879 |
| H | 3.108521  | -0.613740 | 0.577751  |
| H | 1.527041  | -0.365383 | 2.845759  |
| C | -1.174241 | 0.229167  | 2.238238  |
| H | -1.967885 | -0.399758 | 1.777340  |
| H | -0.904991 | -0.128620 | 3.233693  |
| H | -1.479567 | 1.278830  | 2.298339  |
| C | -1.194001 | 0.463144  | -0.777353 |
| H | -1.964476 | -0.351926 | -0.454238 |
| H | -1.646632 | 1.429287  | -0.522883 |
| H | -0.973291 | 0.437189  | -1.846138 |
| F | -2.715827 | -1.327532 | 0.442495  |

**XYZ coordinates and total energies of type 3b species at the B3LYP/6-31+G\* level**

**A = CH<sub>3</sub>COO-**

E(B3LYP/6-31+G\*)= -573.240633

|   |           |           |           |
|---|-----------|-----------|-----------|
| C | 0.562937  | -0.638486 | -0.147257 |
| C | 0.461216  | -0.725747 | 1.199219  |
| N | 1.647687  | -0.224951 | 1.741210  |
| C | 2.498372  | 0.164635  | 0.723625  |
| N | 1.809038  | -0.088870 | -0.444695 |
| C | 1.996571  | -0.160115 | 3.143554  |
| C | 2.352694  | 0.159991  | -1.768522 |
| O | 5.425618  | -1.778580 | 0.814930  |
| C | 5.513521  | -2.408693 | -0.361029 |
| O | 4.915493  | -2.062847 | -1.368997 |
| C | 6.443179  | -3.601195 | -0.299718 |
| H | 2.199491  | 0.874528  | 3.446798  |
| H | 1.161339  | -0.543053 | 3.734008  |
| H | 2.887245  | -0.766774 | 3.349839  |
| H | 3.280142  | -0.404542 | -1.905896 |
| H | 1.620150  | -0.163226 | -2.511529 |
| H | 2.547565  | 1.231135  | -1.906579 |
| H | -0.131535 | -0.916936 | -0.924665 |
| H | -0.338068 | -1.091087 | 1.825111  |
| C | 3.797183  | 0.631567  | 0.852073  |
| H | 6.471964  | -4.099881 | -1.269908 |
| H | 7.450730  | -3.273514 | -0.020236 |
| H | 6.104415  | -4.302339 | 0.470964  |
| H | 4.273243  | 1.087985  | -0.009288 |
| H | 4.135237  | 0.972958  | 1.825074  |
| H | 4.811866  | -0.965053 | 0.752426  |

**A = SH-**

E(B3LYP/6-31+G\*)= -743.522463

|   |           |           |           |
|---|-----------|-----------|-----------|
| C | -0.064880 | 0.150508  | -0.009082 |
| C | -0.011096 | 0.048902  | 1.338162  |
| N | 1.330148  | -0.099911 | 1.700306  |
| C | 2.127511  | -0.091000 | 0.563643  |
| N | 1.242453  | 0.065703  | -0.494679 |
| C | 1.855880  | -0.244450 | 3.038115  |
| C | 3.489553  | -0.244302 | 0.497509  |
| C | 1.659344  | 0.125605  | -1.876734 |
| S | 3.344537  | -3.893157 | 0.177041  |
| H | 2.173205  | -0.799053 | -2.168922 |
| H | 0.777393  | 0.253754  | -2.508373 |
| H | 2.339680  | 0.971596  | -2.041726 |
| H | 2.388188  | -1.198112 | 3.146587  |
| H | 2.550288  | 0.572825  | 3.274010  |
| H | 1.027574  | -0.220147 | 3.749849  |
| H | -0.907728 | 0.271158  | -0.671951 |
| H | -0.797962 | 0.064054  | 2.076371  |
| H | 3.407169  | -2.528351 | 0.309660  |
| H | 4.009810  | -0.134837 | -0.445443 |
| H | 4.084136  | -0.274697 | 1.401595  |
| H | 4.686162  | -4.020260 | 0.105589  |

**A = CN-**

E(B3LYP/6-31+G\*)= -437.566734

|   |           |           |           |
|---|-----------|-----------|-----------|
| N | 0.266960  | -0.131172 | -0.139653 |
| C | 0.148183  | -0.556428 | 1.186404  |
| C | 1.313212  | -0.278658 | 1.813156  |
| N | 2.164612  | 0.321491  | 0.881320  |
| C | 1.523295  | 0.421178  | -0.345237 |
| C | 3.504698  | 0.806383  | 1.120837  |
| C | 2.035704  | 0.920127  | -1.518815 |
| C | -0.747537 | -0.206310 | -1.166081 |
| C | 3.393099  | -1.893389 | -2.816865 |
| N | 3.858655  | -2.853421 | -3.269654 |
| H | 4.229078  | 0.287756  | 0.479856  |
| H | 3.570366  | 1.883818  | 0.920671  |
| H | 3.766786  | 0.624557  | 2.165426  |
| H | -1.001478 | 0.795453  | -1.536544 |
| H | -0.403684 | -0.814436 | -2.012516 |
| H | -1.644909 | -0.665424 | -0.745536 |
| H | -0.753846 | -1.021884 | 1.552455  |
| H | 1.623512  | -0.454944 | 2.831456  |
| H | 1.392895  | 1.055319  | -2.380355 |
| H | 2.988487  | 1.435805  | -1.521999 |
| H | 2.954334  | -0.989973 | -2.388416 |

**A = F-**

E(B3LYP/6-31+G\*)= -444.594522

|   |           |           |           |
|---|-----------|-----------|-----------|
| C | 0.150803  | -0.111199 | 0.064755  |
| N | 0.124304  | -0.009642 | 1.456603  |
| C | 1.411211  | 0.073727  | 1.941662  |
| N | 2.224533  | 0.062232  | 0.829660  |
| C | 1.446581  | -0.067883 | -0.322130 |
| C | 1.809037  | 0.049483  | 3.275557  |
| C | -1.044041 | -0.115584 | 2.307791  |
| C | 3.672108  | 0.051340  | 0.898648  |
| H | 4.039005  | 0.945669  | 1.415274  |
| H | 4.025381  | -0.838214 | 1.433990  |
| H | 4.073106  | 0.041179  | -0.116929 |
| H | 1.890340  | -0.103750 | -1.304908 |
| H | -0.755499 | -0.192217 | -0.514987 |
| H | -0.969643 | -1.000370 | 2.951204  |
| H | -1.144206 | 0.775273  | 2.938584  |
| H | -1.931698 | -0.203490 | 1.678073  |
| H | 1.069908  | 0.299409  | 4.030853  |
| H | 2.829455  | 0.339475  | 3.506966  |
| H | 1.911405  | -1.661382 | 3.546140  |
| F | 1.947898  | -2.651880 | 3.673953  |

**A = CH<sub>3</sub>O-**

E(B3LYP/6-31+G\*)= -459.864414

|   |           |           |           |
|---|-----------|-----------|-----------|
| C | 0.269739  | -0.637468 | 0.085521  |
| N | 0.032342  | 0.180257  | 1.180399  |
| C | 1.214739  | 0.827134  | 1.551671  |
| C | 2.192528  | 0.397843  | 0.722307  |
| N | 1.627623  | -0.517674 | -0.167247 |
| C | -1.278191 | 0.381488  | 1.752048  |
| C | 2.281155  | -1.118336 | -1.311892 |
| O | -0.354588 | 0.473066  | -3.122385 |
| C | -1.485046 | 1.172053  | -3.616948 |
| H | 1.247585  | 1.513027  | 2.384019  |
| H | 3.242733  | 0.643352  | 0.688470  |
| H | 3.345574  | -0.874965 | -1.275669 |
| H | 2.170691  | -2.209276 | -1.287093 |
| H | 1.856133  | -0.735598 | -2.248480 |
| H | -1.190541 | 1.037316  | 2.621260  |
| H | -1.959108 | 0.843802  | 1.024159  |
| H | -1.709953 | -0.574663 | 2.073283  |
| C | -0.655825 | -1.358143 | -0.634183 |
| H | -1.165132 | 1.711255  | -4.513785 |
| H | -2.304611 | 0.491724  | -3.895941 |
| H | -1.869858 | 1.906054  | -2.891564 |
| H | -0.610229 | -0.029229 | -2.314232 |
| H | -0.326066 | -2.081715 | -1.370232 |
| H | -1.675315 | -1.441307 | -0.277861 |

**A = OH-**

E(B3LYP/6-31+G\*)= -420.562289

|   |           |           |           |
|---|-----------|-----------|-----------|
| C | 0.187136  | -0.453535 | 0.201652  |
| N | 0.179447  | -0.043718 | 1.537972  |
| C | 1.419861  | 0.475339  | 1.875186  |
| N | 2.162596  | 0.427094  | 0.705993  |
| C | 1.406050  | -0.164914 | -0.307134 |
| O | 3.622810  | -1.662322 | 3.308374  |
| C | -0.887939 | -0.232907 | 2.492236  |
| C | 3.571987  | 0.755738  | 0.644775  |
| H | 4.152183  | 0.096458  | 1.302808  |
| H | 3.917213  | 0.630556  | -0.384087 |
| H | 3.735745  | 1.797925  | 0.944729  |
| H | -0.586071 | -0.930615 | 3.285248  |
| H | -1.166579 | 0.722145  | 2.954822  |
| H | -1.759449 | -0.640178 | 1.974688  |
| H | 1.805256  | -0.307601 | -1.299383 |
| H | -0.683828 | -0.891292 | -0.261006 |
| C | 1.843194  | 0.883621  | 3.120272  |
| H | 3.869293  | -1.892099 | 4.216483  |
| H | 2.981006  | -0.917323 | 3.388817  |
| H | 2.781205  | 1.415700  | 3.224851  |
| H | 1.133311  | 0.962825  | 3.934475  |

**A = H-**

E(B3LYP/6-31+G\*)= -345.305231

|   |           |           |           |
|---|-----------|-----------|-----------|
| C | -0.057866 | 0.015840  | 0.000555  |
| C | -0.058794 | 0.015094  | 1.352729  |
| N | 1.271390  | 0.022224  | 1.781271  |
| C | 2.122432  | 0.051631  | 0.678168  |
| N | 1.272910  | 0.023513  | -0.426131 |
| C | 1.742625  | 0.089370  | 3.142190  |
| C | 3.486228  | 0.107214  | 0.679149  |
| C | 1.746162  | 0.090769  | -1.786335 |
| H | 4.299422  | -4.005704 | 0.724429  |
| H | 2.301259  | 1.022755  | -1.964255 |
| H | 2.410314  | -0.754797 | -2.009220 |
| H | 0.890306  | 0.053943  | -2.464651 |
| H | -0.876880 | -0.005827 | -0.701904 |
| H | -0.878784 | -0.007341 | 2.054027  |
| H | 2.406189  | -0.756337 | 3.366270  |
| H | 2.297692  | 1.021233  | 3.320882  |
| H | 0.885714  | 0.052829  | 3.819188  |
| H | 4.042467  | 0.127261  | 1.606964  |
| H | 4.043780  | 0.128797  | -0.247854 |
| H | 4.143112  | -3.278349 | 0.712493  |

**XYZ coordinates and total energies of type 3c species at the B3LYP/6-31+G\* level**

**A = CN-**

E(B3LYP/6-31+G\*)= -398.255042

|   |           |           |           |
|---|-----------|-----------|-----------|
| C | 0.009634  | 0.023155  | 0.005381  |
| N | -0.034394 | -0.086196 | 1.418659  |
| C | 1.373753  | -0.042792 | 1.827829  |
| N | 2.103936  | -0.534739 | 0.654364  |
| C | 1.249824  | -0.236844 | -0.437873 |
| C | 1.637824  | -0.848772 | 3.039943  |
| C | -0.928944 | 0.782322  | 2.170650  |
| C | 3.505981  | -0.148010 | 0.585561  |
| H | 4.052766  | -0.593643 | 1.422359  |
| H | 3.935696  | -0.533845 | -0.342988 |
| H | 3.640577  | 0.948655  | 0.612792  |
| H | -0.964487 | 0.458900  | 3.215601  |
| H | -0.614826 | 1.841328  | 2.133650  |
| H | -1.937300 | 0.698121  | 1.756093  |
| H | 1.597895  | -0.376141 | -1.452177 |
| H | -0.905084 | 0.148606  | -0.557577 |
| H | 1.677157  | 1.012749  | 2.057183  |
| N | 1.858586  | -1.444613 | 4.011042  |

**A = F-**

E(B3LYP/6-31+G\*)= -444.600790

|   |           |           |           |
|---|-----------|-----------|-----------|
| C | -0.029455 | -0.306084 | -0.014078 |
| N | -0.027021 | 0.099228  | 1.347049  |
| N | 1.239977  | 0.117180  | -0.489828 |
| C | 2.078458  | 0.307292  | 0.629728  |
| C | 1.315593  | 0.296496  | 1.735714  |
| C | 1.768825  | -0.380663 | -1.750534 |
| H | 1.038140  | -0.229139 | -2.549217 |
| H | 2.664638  | 0.194774  | -2.003255 |
| H | 2.024431  | -1.447294 | -1.701516 |
| H | 3.130901  | 0.516129  | 0.507035  |
| H | 1.572898  | 0.494072  | 2.765792  |
| C | -1.013022 | -0.419966 | 2.282550  |
| H | -2.020506 | -0.272620 | 1.885036  |
| H | -0.866511 | -1.488070 | 2.490230  |
| H | -0.936451 | 0.144137  | 3.217109  |
| C | -1.242529 | 0.063934  | -0.847167 |
| H | -2.149467 | -0.357907 | -0.406932 |
| H | -1.338729 | 1.152273  | -0.902934 |
| H | -1.149495 | -0.343838 | -1.856800 |
| F | -0.066579 | -1.841601 | -0.054723 |

**A = CH<sub>3</sub>O-**

E(B3LYP/6-31+G\*)= -459.860231

|   |           |           |           |
|---|-----------|-----------|-----------|
| C | 0.078794  | -0.078060 | 0.011336  |
| C | 0.101319  | -0.075223 | 1.355061  |
| N | 1.431365  | 0.093388  | 1.812409  |
| C | 2.303417  | 0.177293  | 0.628419  |
| N | 1.375094  | 0.073635  | -0.490532 |
| C | 1.633449  | 0.959264  | 2.966541  |
| O | 3.156557  | -0.993661 | 0.515719  |
| C | 3.905974  | -1.357918 | 1.663598  |
| C | 1.633874  | 0.663112  | -1.787540 |
| H | 2.623015  | 0.364546  | -2.147779 |
| H | 0.893905  | 0.275831  | -2.495374 |
| H | 1.567087  | 1.765125  | -1.795005 |
| H | 2.650299  | 0.857191  | 3.356289  |
| H | 1.437002  | 2.024974  | 2.758783  |
| H | 0.945094  | 0.637290  | 3.755070  |
| H | -0.748151 | -0.276344 | -0.657809 |
| H | -0.697589 | -0.277755 | 2.055446  |
| C | 3.179591  | 1.435303  | 0.581304  |
| H | 4.416529  | -2.290318 | 1.408477  |
| H | 4.667602  | -0.607275 | 1.928469  |
| H | 3.251844  | -1.533646 | 2.527419  |
| H | 3.789260  | 1.424964  | -0.325691 |
| H | 2.563807  | 2.341887  | 0.584189  |
| H | 3.860120  | 1.482979  | 1.435455  |

**A = OH-**

E(B3LYP/6-31+G\*)= -420.567217

|   |           |           |           |
|---|-----------|-----------|-----------|
| C | -0.010385 | 0.042788  | -0.013014 |
| C | -0.008825 | 0.049849  | 1.331679  |
| N | 1.318760  | -0.038175 | 1.797549  |
| C | 2.217910  | 0.214361  | 0.655835  |
| N | 1.316061  | -0.050495 | -0.480965 |
| C | 1.664064  | 0.478325  | 3.110882  |
| O | 3.319740  | -0.678425 | 0.659359  |
| C | 2.834924  | 1.619383  | 0.647473  |
| C | 1.658617  | 0.451520  | -1.800622 |
| H | 2.692498  | 0.181983  | -2.034862 |
| H | 1.010651  | -0.031734 | -2.539511 |
| H | 1.540249  | 1.543746  | -1.899908 |
| H | 2.698722  | 0.212162  | 3.345579  |
| H | 1.545020  | 1.571460  | 3.198701  |
| H | 1.018334  | 0.002492  | 3.856524  |
| H | -0.844413 | -0.036893 | -0.696873 |
| H | -0.841248 | -0.022460 | 2.018303  |
| H | 2.940147  | -1.575178 | 0.664191  |
| H | 3.463457  | 1.754921  | -0.236436 |
| H | 2.042626  | 2.376294  | 0.644281  |
| H | 3.465451  | 1.764585  | 1.528422  |



**A = H-**

E(B3LYP/6-31+G\*)= -345.338004

|   |           |           |           |
|---|-----------|-----------|-----------|
| C | -0.079372 | -0.287697 | -0.048310 |
| N | -0.103079 | 0.198099  | 1.345163  |
| N | 1.210291  | 0.216649  | -0.558927 |
| C | 2.017755  | 0.403247  | 0.588930  |
| C | 1.255011  | 0.392475  | 1.694736  |
| C | 1.777157  | -0.530614 | -1.670302 |
| H | 1.126590  | -0.453234 | -2.547154 |
| H | 2.748461  | -0.101821 | -1.935799 |
| H | 1.917928  | -1.601589 | -1.429154 |
| H | 3.064599  | 0.657204  | 0.487113  |
| H | 1.529433  | 0.635524  | 2.712756  |
| C | -0.933715 | -0.568901 | 2.259847  |
| H | -1.985154 | -0.497181 | 1.964172  |
| H | -0.648546 | -1.637837 | 2.291650  |
| H | -0.840714 | -0.152514 | 3.267695  |
| C | -1.277091 | 0.174960  | -0.869945 |
| H | -2.210819 | -0.210749 | -0.444209 |
| H | -1.318760 | 1.268137  | -0.888037 |
| H | -1.207354 | -0.196577 | -1.899007 |
| H | -0.048526 | -1.409249 | -0.037959 |

**XYZ coordinates and total energies of type 5a species at the B3LYP/6-31+G\* level**

**A = CF<sub>3</sub>SO<sub>3</sub><sup>-</sup> (isomer 1)**

E(B3LYP/6-31+G\*)= -1249.655918

|   |           |           |           |
|---|-----------|-----------|-----------|
| C | -0.154102 | 0.269456  | 0.144125  |
| C | -0.080503 | 0.359513  | 1.530602  |
| N | 1.072936  | 0.075557  | 2.173524  |
| C | 2.186835  | -0.290895 | 1.489193  |
| C | 2.166986  | -0.380688 | 0.110872  |
| C | 0.976683  | -0.099461 | -0.576767 |
| C | 1.111922  | 0.169493  | 3.656632  |
| H | 1.639368  | 1.084367  | 3.939544  |
| O | -3.065480 | 0.153304  | 1.595843  |
| S | -3.281029 | -0.033286 | 3.056769  |
| C | -3.365205 | -1.906105 | 3.229921  |
| F | -2.219413 | -2.477407 | 2.770793  |
| O | -2.053993 | 0.296757  | 3.851833  |
| O | -4.552132 | 0.443761  | 3.609617  |
| F | -3.512598 | -2.276863 | 4.514416  |
| F | -4.385507 | -2.421872 | 2.524033  |
| H | 3.066318  | -0.506365 | 2.085107  |
| H | 3.068462  | -0.677753 | -0.413937 |
| H | 0.940528  | -0.179927 | -1.659185 |
| H | -1.113201 | 0.471142  | -0.320125 |
| H | -0.934762 | 0.613796  | 2.150764  |
| H | 0.083557  | 0.190504  | 4.023853  |
| H | 1.636715  | -0.703647 | 4.048718  |

**A = CF<sub>3</sub>SO<sub>3</sub>- (isomer 2)**

E(B3LYP/6-31+G\*)= -1249.656918

|   |           |           |           |
|---|-----------|-----------|-----------|
| C | -0.004818 | 0.066198  | 0.013018  |
| C | -0.046712 | 0.057970  | 1.402509  |
| N | 1.104154  | -0.007018 | 2.112218  |
| C | 2.306599  | -0.079049 | 1.493963  |
| C | 2.396109  | -0.076402 | 0.113316  |
| C | 1.221622  | -0.002249 | -0.643509 |
| C | 1.015222  | -0.066393 | 3.592950  |
| H | 0.436281  | 0.788675  | 3.945669  |
| O | -2.575922 | -0.455786 | 2.909540  |
| S | -2.395894 | -1.898581 | 3.257225  |
| C | -2.602046 | -1.896131 | 5.127394  |
| F | -2.431626 | -3.127695 | 5.638918  |
| O | -0.981394 | -2.345316 | 3.084264  |
| O | -3.432446 | -2.816966 | 2.773467  |
| F | -1.677961 | -1.083380 | 5.703269  |
| F | -3.816475 | -1.453447 | 5.490439  |
| H | 3.175168  | -0.141507 | 2.138389  |
| H | 3.372540  | -0.136182 | -0.354675 |
| H | 1.268096  | -0.003461 | -1.728467 |
| H | -0.942512 | 0.111101  | -0.529990 |
| H | -0.980686 | 0.068131  | 1.972203  |
| H | 0.494523  | -0.993489 | 3.850776  |
| H | 2.022980  | -0.037137 | 4.007348  |

**A = CF<sub>3</sub>SO<sub>3</sub>- (isomer 3)**

E(B3LYP/6-31+G\*)= -1249.657513

|   |           |           |           |
|---|-----------|-----------|-----------|
| C | -0.030131 | -0.014744 | 0.072590  |
| C | -0.012228 | 0.140078  | 1.459112  |
| C | 1.203158  | 0.133753  | 2.123633  |
| N | 2.362320  | 0.012299  | 1.439291  |
| C | 2.361420  | -0.175110 | 0.102501  |
| C | 1.174758  | -0.175579 | -0.612114 |
| C | 3.634926  | -0.003486 | 2.195403  |
| H | 3.883175  | 1.018847  | 2.494382  |
| O | 1.919872  | -2.395046 | 3.205316  |
| S | 2.434517  | -3.412640 | 2.240826  |
| O | 3.203134  | -4.519742 | 2.823060  |
| C | 0.852661  | -4.224130 | 1.620871  |
| F | 1.111328  | -5.151667 | 0.682894  |
| F | 0.026007  | -3.299647 | 1.060414  |
| F | 0.176085  | -4.814066 | 2.620991  |
| O | 2.995876  | -2.800206 | 1.002800  |
| H | 3.325650  | -0.336721 | -0.359811 |
| H | 1.204567  | -0.334004 | -1.684068 |
| H | -0.973307 | -0.032519 | -0.464966 |
| H | -0.926809 | 0.231394  | 2.033732  |
| H | 1.288678  | 0.207451  | 3.199271  |
| H | 3.497380  | -0.653895 | 3.060082  |
| H | 4.414249  | -0.420884 | 1.560604  |

**A = CF<sub>3</sub>SO<sub>3</sub>- (isomer 4)**

E(B3LYP/6-31+G\*)= -1249.642988

|   |           |           |           |
|---|-----------|-----------|-----------|
| C | 0.012013  | 0.043363  | 0.009152  |
| C | 0.001024  | 0.014534  | 1.387660  |
| N | 1.161991  | -0.015065 | 2.093628  |
| C | 2.359241  | -0.031836 | 1.448331  |
| C | 2.420853  | -0.003306 | 0.072098  |
| C | 1.235554  | 0.071101  | -0.672094 |
| C | 1.128367  | 0.052556  | 3.567418  |
| H | 1.184333  | 1.096551  | 3.888358  |
| O | 1.322960  | 2.642537  | -1.076363 |
| S | 1.641372  | 2.842953  | -2.525406 |
| C | 3.482941  | 3.237139  | -2.469100 |
| F | 3.728532  | 4.358439  | -1.765927 |
| O | 1.601191  | 1.573197  | -3.299153 |
| O | 1.040310  | 4.024756  | -3.155845 |
| F | 4.171289  | 2.226500  | -1.867106 |
| F | 3.996418  | 3.394753  | -3.699889 |
| H | 3.240148  | -0.050563 | 2.079562  |
| H | 3.386359  | 0.018883  | -0.419888 |
| H | 1.272782  | 0.144752  | -1.756359 |
| H | -0.927502 | 0.094885  | -0.529234 |
| H | -0.911752 | 0.028579  | 1.971912  |
| H | 0.200682  | -0.394061 | 3.927580  |
| H | 1.974235  | -0.504181 | 3.973475  |

**A = Cl- (isomer 1)**

E(B3LYP/6-31+G\*)= -748.399753

|    |           |           |           |
|----|-----------|-----------|-----------|
| C  | 0.081602  | 0.187021  | -0.028367 |
| N  | 0.016204  | 0.003897  | 1.324315  |
| C  | 1.152266  | -0.176925 | 2.061356  |
| C  | 2.367308  | -0.366236 | 1.456583  |
| C  | 2.433528  | -0.357743 | 0.040460  |
| C  | 1.299194  | -0.101582 | -0.691249 |
| C  | -1.260744 | 0.299268  | 1.987477  |
| H  | -1.468520 | 1.367220  | 1.862440  |
| Cl | -0.156959 | 2.631842  | -0.277466 |
| H  | 1.020760  | -0.186874 | 3.136896  |
| H  | 3.248442  | -0.532638 | 2.065689  |
| H  | 3.378862  | -0.546853 | -0.459505 |
| H  | 1.314396  | -0.049791 | -1.773600 |
| H  | -0.862082 | 0.181316  | -0.550704 |
| H  | -2.057074 | -0.286548 | 1.521038  |
| H  | -1.190571 | 0.036269  | 3.043850  |

**A = Cl- (isomer 2)**

E(B3LYP/6-31+G\*)= -748.395325

|    |           |           |           |
|----|-----------|-----------|-----------|
| C  | -0.011372 | -0.270486 | 0.044320  |
| N  | 0.015495  | -0.006725 | 1.373895  |
| C  | 1.187578  | 0.135173  | 2.041780  |
| C  | 2.397032  | -0.002618 | 1.389137  |
| C  | 2.399960  | -0.283914 | 0.014486  |
| C  | 1.187428  | -0.407419 | -0.653865 |
| C  | -1.277670 | 0.134806  | 2.088329  |
| H  | -1.125670 | 0.763667  | 2.966650  |
| Cl | -2.708633 | 1.033984  | -0.841817 |
| H  | 1.110773  | 0.357547  | 3.099761  |
| H  | 3.319061  | 0.114774  | 1.947873  |
| H  | 3.339842  | -0.395949 | -0.518273 |
| H  | 1.140640  | -0.599221 | -1.720499 |
| H  | -1.004741 | -0.252396 | -0.428873 |
| H  | -1.994062 | 0.588415  | 1.385653  |
| H  | -1.627594 | -0.856780 | 2.387964  |

**A = Cl- (isomer 3)**

E(B3LYP/6-31+G\*)= -748.391556

|    |           |           |           |
|----|-----------|-----------|-----------|
| C  | -0.040557 | -0.420954 | -0.035337 |
| N  | 0.010411  | 0.135305  | 1.222146  |
| C  | 1.224578  | 0.192951  | 1.866894  |
| C  | 2.381582  | -0.183514 | 1.259479  |
| C  | 2.393951  | -0.564023 | -0.137427 |
| C  | 1.081463  | -0.814391 | -0.695271 |
| C  | -1.223535 | 0.455589  | 1.938125  |
| H  | -1.027761 | 1.248769  | 2.663293  |
| Cl | 3.212748  | 1.125840  | -1.227624 |
| H  | 1.192929  | 0.542416  | 2.893326  |
| H  | 3.313369  | -0.118327 | 1.809847  |
| H  | 3.203557  | -1.202108 | -0.469991 |
| H  | 0.988735  | -1.246507 | -1.685254 |
| H  | -1.034049 | -0.538181 | -0.454855 |
| H  | -1.972900 | 0.816225  | 1.229582  |
| H  | -1.619569 | -0.422435 | 2.464346  |

**A = ClCH<sub>2</sub>COO-**

E(B3LYP/6-31+G\*)= -976.268751

|    |           |           |           |
|----|-----------|-----------|-----------|
| C  | 0.055776  | 0.077321  | -0.060508 |
| N  | -0.000814 | 0.084499  | 1.293234  |
| C  | 1.117320  | -0.040869 | 2.048462  |
| C  | 2.352132  | -0.192577 | 1.422727  |
| C  | 2.434545  | -0.210919 | 0.033101  |
| C  | 1.262485  | -0.070004 | -0.719811 |
| C  | -1.297813 | 0.254381  | 1.994590  |
| O  | 0.851477  | 0.448784  | 4.878875  |
| C  | 0.312128  | 1.580836  | 4.959601  |
| C  | 0.331666  | 2.364473  | 6.288246  |
| O  | -0.293630 | 2.208229  | 4.041714  |
| H  | 0.991169  | 0.033059  | 3.150096  |
| H  | 3.234285  | -0.284956 | 2.047387  |
| H  | 3.393374  | -0.327798 | -0.463701 |
| H  | 1.278393  | -0.070769 | -1.804253 |
| H  | -0.887621 | 0.193235  | -0.580743 |
| H  | -2.054909 | 0.543522  | 1.264700  |
| H  | -1.567529 | -0.694988 | 2.463772  |
| H  | -1.151317 | 1.031158  | 2.765440  |
| H  | -0.693616 | 2.495335  | 6.640032  |
| Cl | 1.262662  | 1.603596  | 7.649458  |
| H  | 0.766359  | 3.350446  | 6.116559  |

**A = CH<sub>3</sub>COO- (isomer 1)**

E(B3LYP/6-31+G\*)= -516.672649

|   |           |           |           |
|---|-----------|-----------|-----------|
| N | 0.134222  | -0.267508 | 0.078085  |
| C | 0.122824  | -0.554499 | 1.532451  |
| C | 1.301305  | -0.442462 | -0.588313 |
| C | 1.357242  | -0.152384 | -1.950140 |
| C | 0.228173  | 0.316500  | -2.614695 |
| C | -0.959662 | 0.496604  | -1.894363 |
| C | -0.975678 | 0.197406  | -0.544684 |
| H | 2.183666  | -0.766361 | 0.013042  |
| H | 2.302403  | -0.293316 | -2.463838 |
| H | 0.264153  | 0.545242  | -3.676042 |
| H | -1.862634 | 0.867052  | -2.367319 |
| H | -1.857639 | 0.317760  | 0.073246  |
| H | -0.825225 | -0.214123 | 1.950878  |
| H | 0.238599  | -1.630826 | 1.679095  |
| H | 0.987524  | -0.017489 | 1.961478  |
| C | 3.665118  | 0.078739  | 1.742563  |
| O | 2.700360  | 0.879713  | 1.925312  |
| O | 3.629471  | -0.951746 | 0.998513  |
| C | 4.985030  | 0.358884  | 2.470176  |
| H | 4.923452  | 1.271972  | 3.068309  |
| H | 5.233208  | -0.489347 | 3.119684  |
| H | 5.797751  | 0.450191  | 1.739617  |

**A = CH<sub>3</sub>COO- (isomer 1)**

E(B3LYP/6-31+G\*)= -516.655832

|   |           |           |           |
|---|-----------|-----------|-----------|
| N | -0.054023 | 0.013269  | -0.011261 |
| C | 0.272885  | -0.027310 | 1.427512  |
| C | 0.961173  | -0.006066 | -0.922016 |
| C | 0.705804  | -0.000402 | -2.278085 |
| C | -0.628616 | 0.025897  | -2.714563 |
| C | -1.659245 | 0.045820  | -1.769468 |
| C | -1.347034 | 0.038131  | -0.419928 |
| H | 1.963721  | -0.025467 | -0.506631 |
| H | 1.504184  | -0.014489 | -3.055898 |
| H | -0.767049 | 0.029589  | -3.803472 |
| H | -2.703532 | 0.068829  | -2.065019 |
| H | -2.096963 | 0.051794  | 0.362631  |
| H | -0.622670 | 0.195991  | 2.007829  |
| H | 0.641922  | -1.021616 | 1.693000  |
| H | 1.038656  | 0.719836  | 1.645564  |
| C | 1.518840  | -0.019939 | -5.594921 |
| O | 0.257587  | 0.001674  | -5.482715 |
| O | 2.356233  | -0.032387 | -4.638293 |
| C | 2.109613  | -0.017707 | -7.013063 |
| H | 1.328358  | -0.130411 | -7.770177 |
| H | 2.641054  | 0.927513  | -7.182890 |
| H | 2.847082  | -0.822550 | -7.114302 |

**A = CN- (isomer 1)**

E(B3LYP/6-31+G\*)= -380.982632

|   |           |           |           |
|---|-----------|-----------|-----------|
| C | -0.009513 | -0.118669 | 0.026629  |
| N | 0.014412  | -0.006679 | 1.375403  |
| C | 1.180281  | 0.110087  | 2.060324  |
| C | 2.391809  | 0.118565  | 1.397635  |
| C | 2.401602  | 0.004288  | -0.000234 |
| C | 1.193793  | -0.114138 | -0.678899 |
| C | -1.272414 | -0.011744 | 2.126053  |
| H | -1.359442 | 0.929970  | 2.673323  |
| N | -2.814919 | -0.318832 | -0.639778 |
| C | -3.995018 | -0.373657 | -0.577598 |
| H | 1.094017  | 0.194104  | 3.137990  |
| H | 3.310135  | 0.212970  | 1.966901  |
| H | 3.343448  | 0.008742  | -0.541424 |
| H | 1.154488  | -0.204890 | -1.759286 |
| H | -1.023801 | -0.208444 | -0.425387 |
| H | -2.091528 | -0.114662 | 1.405148  |
| H | -1.265745 | -0.854161 | 2.821883  |



**A = CN- (isomer 2)**

E(B3LYP/6-31+G\*)= -380.976062

|   |           |           |           |
|---|-----------|-----------|-----------|
| C | 0.155834  | -0.028721 | -0.036571 |
| N | 0.054802  | 0.017724  | 1.307473  |
| C | 1.163027  | 0.062543  | 2.097274  |
| C | 2.421071  | 0.061365  | 1.530806  |
| C | 2.547956  | 0.013332  | 0.131028  |
| C | 1.403216  | -0.032123 | -0.655010 |
| C | -1.288075 | 0.021052  | 1.931636  |
| H | -1.417686 | 0.941127  | 2.506549  |
| C | -1.528997 | -0.150329 | -2.487984 |
| N | -0.514818 | -0.157131 | -3.094436 |
| H | 0.991627  | 0.097994  | 3.167296  |
| H | 3.291399  | 0.097408  | 2.177364  |
| H | 3.533934  | 0.011855  | -0.324833 |
| H | 1.386513  | -0.071959 | -1.745036 |
| H | -0.756154 | -0.065191 | -0.652722 |
| H | -2.036236 | -0.028466 | 1.140624  |
| H | -1.384507 | -0.847527 | 2.587400  |

**A = CN- (isomer 3)**

E(B3LYP/6-31+G\*)= -380.967400

|   |           |           |           |
|---|-----------|-----------|-----------|
| C | -0.032151 | -0.001053 | 0.033631  |
| N | -0.029787 | -0.009275 | 1.396908  |
| C | 1.138421  | -0.033715 | 2.084338  |
| C | 2.351578  | -0.052430 | 1.415645  |
| C | 2.367681  | -0.044017 | 0.017811  |
| C | 1.149997  | -0.017684 | -0.675822 |
| C | -1.319666 | 0.040804  | 2.114530  |
| H | -1.767107 | 1.031063  | 1.995478  |
| C | 2.806036  | -0.016509 | -3.264070 |
| N | 3.775428  | -0.035342 | -2.586718 |
| H | 1.058184  | -0.037749 | 3.165235  |
| H | 3.269621  | -0.074620 | 1.993934  |
| H | 3.278335  | -0.056513 | -0.595967 |
| H | 1.185056  | -0.011709 | -1.771386 |
| H | -1.009334 | 0.018993  | -0.437079 |
| H | -1.989637 | -0.718992 | 1.707029  |
| H | -1.150948 | -0.158411 | 3.172853  |

**A = CN- (isomer 4)**

E(B3LYP/6-31+G\*)= -380.967377

|   |           |           |           |
|---|-----------|-----------|-----------|
| C | -0.008603 | -0.003066 | 0.031531  |
| N | -0.023517 | -0.009662 | 1.394753  |
| C | 1.135017  | -0.032480 | 2.097913  |
| C | 2.356818  | -0.051215 | 1.444585  |
| C | 2.387983  | -0.044530 | 0.047662  |
| C | 1.181874  | -0.019719 | -0.665145 |
| C | -1.322658 | 0.040883  | 2.095721  |
| H | -1.766016 | 1.032692  | 1.974305  |
| N | 2.667275  | -0.016659 | -3.212155 |
| C | 3.747329  | -0.031021 | -2.730171 |
| H | 1.040814  | -0.035304 | 3.177618  |
| H | 3.267947  | -0.072153 | 2.033767  |
| H | 3.311340  | -0.057254 | -0.543255 |
| H | 1.243726  | -0.014971 | -1.761800 |
| H | -0.980143 | 0.015758  | -0.450728 |
| H | -1.988913 | -0.715616 | 1.676311  |
| H | -1.168568 | -0.162844 | 3.155437  |

**A = F-**

E(B3LYP/6-31+G\*)= -388.019084

|   |           |           |           |
|---|-----------|-----------|-----------|
| N | 0.040144  | 0.008417  | 0.038495  |
| C | -0.001613 | -0.035626 | 1.394015  |
| C | 1.214136  | -0.041527 | 2.088464  |
| C | 2.424429  | -0.003382 | 1.407556  |
| C | 2.419548  | 0.041694  | 0.004198  |
| C | 1.207247  | 0.046491  | -0.654619 |
| H | -1.097168 | -0.063278 | 1.820752  |
| H | 1.182011  | -0.076693 | 3.172917  |
| H | 3.367162  | -0.008071 | 1.948367  |
| H | 3.340192  | 0.072616  | -0.568499 |
| H | 1.122178  | 0.080060  | -1.735464 |
| C | -1.250824 | 0.014495  | -0.707273 |
| H | -2.054250 | -0.017903 | 0.046717  |
| H | -1.302147 | 0.927537  | -1.306677 |
| H | -1.280280 | -0.863155 | -1.358856 |
| F | -2.512945 | -0.081676 | 1.874407  |

**XYZ coordinates and total energies of type 5b species at the B3LYP/6-31+G\* level**

**A = SH-**

E(B3LYP/6-31+G\*)= -686.933706

|   |           |           |           |
|---|-----------|-----------|-----------|
| C | -0.029509 | -0.030898 | 0.137503  |
| C | -0.030264 | -0.042576 | 1.558499  |
| N | 1.227722  | -0.045577 | 2.100240  |
| C | 2.396201  | -0.039273 | 1.389305  |
| C | 2.376302  | -0.029715 | 0.014986  |
| C | 1.124681  | -0.025169 | -0.629906 |
| C | 1.349774  | -0.050066 | 3.574242  |
| H | 1.864122  | 0.856955  | 3.907657  |
| H | 3.318359  | -0.041815 | 1.962923  |
| H | 3.308951  | -0.025199 | -0.539398 |
| H | 1.076584  | -0.016450 | -1.717069 |
| H | -0.997911 | -0.025029 | -0.358080 |
| H | 0.345427  | -0.079361 | 3.993163  |
| H | 1.914999  | -0.929623 | 3.898592  |
| H | -1.683841 | 0.020147  | 2.683161  |
| S | -2.805499 | 0.055032  | 3.527485  |
| H | -3.031256 | -1.271481 | 3.408186  |

**A = CN-**

E(B3LYP/6-31+G\*)= -380.979981

|   |           |           |           |
|---|-----------|-----------|-----------|
| C | -0.038558 | -0.016947 | 0.027671  |
| N | -0.010853 | 0.024211  | 1.398518  |
| C | 1.117476  | 0.047395  | 2.171423  |
| C | 2.362527  | 0.028517  | 1.590006  |
| C | 2.435832  | -0.014749 | 0.185008  |
| C | 1.261391  | -0.035555 | -0.550638 |
| C | -1.299656 | 0.051840  | 2.120738  |
| H | -1.392040 | 0.984191  | 2.686948  |
| C | -2.548882 | -0.058605 | -1.975567 |
| N | -3.450695 | -0.074665 | -2.705334 |
| H | 0.973423  | 0.080754  | 3.247227  |
| H | 3.250874  | 0.046435  | 2.212589  |
| H | 3.406586  | -0.031296 | -0.306297 |
| H | 1.319695  | -0.068505 | -1.636623 |
| H | -1.696494 | -0.043072 | -1.268856 |
| H | -2.095462 | -0.009487 | 1.381393  |
| H | -1.363818 | -0.798882 | 2.806493  |

**A = CH<sub>3</sub>O-**

E(B3LYP/6-31+G\*)= -403.279056

|   |           |           |           |
|---|-----------|-----------|-----------|
| C | 0.011117  | 0.066922  | -0.012570 |
| C | -0.000118 | 0.078727  | 1.408744  |
| N | 1.255918  | 0.035860  | 1.958035  |
| C | 2.425681  | -0.012903 | 1.252810  |
| C | 2.414894  | -0.025087 | -0.121886 |
| C | 1.168379  | 0.015549  | -0.773829 |
| C | 1.375302  | 0.064162  | 3.434017  |
| H | 1.822340  | 1.013089  | 3.747680  |
| O | -1.981989 | 0.238755  | 3.518798  |
| H | 3.344029  | -0.040365 | 1.831607  |
| H | 3.350371  | -0.065597 | -0.670040 |
| H | 1.125206  | 0.006777  | -1.861181 |
| H | -0.952324 | 0.100594  | -0.516301 |
| H | -1.407502 | 0.193791  | 2.698113  |
| H | 0.377609  | -0.028884 | 3.860764  |
| H | 2.007305  | -0.764249 | 3.768870  |
| C | -3.212959 | -0.408214 | 3.268435  |
| H | -3.790715 | -0.402523 | 4.199324  |
| H | -3.806518 | 0.108573  | 2.495934  |
| H | -3.079337 | -1.457328 | 2.955537  |

**A = OH-**

E(B3LYP/6-31+G\*)= -363.976857

|   |           |           |           |
|---|-----------|-----------|-----------|
| C | -0.005362 | 0.004313  | -0.005800 |
| N | -0.006736 | 0.029956  | 1.365395  |
| C | 1.107727  | 0.033895  | 2.156804  |
| C | 2.363710  | 0.008698  | 1.598483  |
| C | 2.463019  | -0.019408 | 0.194879  |
| C | 1.302344  | -0.020034 | -0.562700 |
| C | -1.311911 | 0.074058  | 2.064579  |
| H | -1.418719 | 1.033282  | 2.581399  |
| O | -2.745165 | 0.096771  | -0.957449 |
| H | 0.943997  | 0.058210  | 3.229977  |
| H | 3.240364  | 0.010717  | 2.237799  |
| H | 3.442683  | -0.039560 | -0.278563 |
| H | 1.379236  | -0.038963 | -1.647609 |
| H | -1.757151 | 0.054937  | -0.785171 |
| H | -2.102686 | -0.033725 | 1.323775  |
| H | -1.366305 | -0.740333 | 2.793813  |
| H | -2.899088 | -0.399340 | -1.774712 |

**A = H-**

E(B3LYP/6-31+G\*)= -288.712351

|   |           |           |           |
|---|-----------|-----------|-----------|
| C | -0.021666 | 0.068897  | -0.203681 |
| N | -0.170941 | 0.000417  | 1.156268  |
| C | 0.843699  | -0.074308 | 2.079569  |
| C | 2.131637  | -0.074988 | 1.463454  |
| C | 2.342511  | -0.010187 | 0.096503  |
| C | 1.231065  | 0.064825  | -0.766839 |
| C | -1.557720 | 0.009929  | 1.663412  |
| H | 1.783929  | -0.051070 | 5.653140  |
| H | 1.527290  | -0.046956 | 4.952649  |
| H | 2.992786  | -0.131800 | 2.126325  |
| H | 3.348827  | -0.016779 | -0.319020 |
| H | 1.341482  | 0.118301  | -1.844986 |
| H | -0.930404 | 0.125527  | -0.796219 |
| H | -1.500977 | -0.063421 | 2.747825  |
| H | -2.058094 | 0.941043  | 1.376156  |
| H | -2.113864 | -0.841846 | 1.257375  |

**XYZ coordinates and total energies of type 5c species at the B3LYP/6-31+G\* level**

**A = CH<sub>3</sub>COO-**

E(B3LYP/6-31+G\*)= -516.654787

|   |           |           |           |
|---|-----------|-----------|-----------|
| C | -0.034407 | 0.092656  | 0.000756  |
| N | -0.330711 | 0.142459  | 1.343879  |
| C | 0.679794  | -0.155232 | 2.230897  |
| C | 1.947766  | -0.494967 | 1.799155  |
| C | 2.252823  | -0.548869 | 0.435494  |
| C | 1.222120  | -0.249252 | -0.460827 |
| C | -1.630013 | 0.387660  | 1.794583  |
| H | 0.390214  | -0.156457 | 3.272820  |
| H | 2.694441  | -0.725007 | 2.552849  |
| H | 3.245162  | -0.814210 | 0.087416  |
| H | 1.384472  | -0.268934 | -1.534260 |
| H | -0.856893 | 0.333444  | -0.661312 |
| H | -1.659049 | 0.820261  | 2.790621  |
| H | -2.251877 | 0.879711  | 1.051301  |
| H | -2.296427 | -1.159338 | 2.185617  |
| O | -2.706776 | -2.086279 | 2.459992  |
| C | -2.071841 | -2.580226 | 3.520983  |
| O | -1.103343 | -2.047816 | 4.050231  |
| C | -2.682230 | -3.877290 | 4.009426  |
| H | -2.098856 | -4.274291 | 4.842028  |
| H | -3.714632 | -3.701181 | 4.332251  |
| H | -2.717876 | -4.607729 | 3.193916  |

**A = SH-**

E(B3LYP/6-31+G\*)= -686.936624

|   |           |           |           |
|---|-----------|-----------|-----------|
| C | -0.005462 | -0.052257 | 0.118012  |
| N | -0.022803 | 0.149707  | 1.494859  |
| C | 1.215227  | 0.197143  | 2.128956  |
| C | 2.398629  | 0.040510  | 1.438941  |
| C | 2.415468  | -0.170825 | 0.054587  |
| C | 1.170366  | -0.210688 | -0.584796 |
| C | -1.185710 | 0.237407  | 2.189283  |
| H | -1.126275 | 0.565915  | 3.217669  |
| H | 1.173413  | 0.357190  | 3.198941  |
| H | 3.321606  | 0.089765  | 2.009751  |
| H | 3.342766  | -0.293063 | -0.492950 |
| H | 1.095532  | -0.365924 | -1.657370 |
| H | -0.980940 | -0.082345 | -0.350731 |
| H | -2.094063 | 0.376449  | 1.619463  |
| H | -1.540580 | -1.843609 | 2.564695  |
| S | -1.782909 | -3.190489 | 2.743060  |
| H | -0.650456 | -3.556187 | 2.105135  |

**A = CN-**

E(B3LYP/6-31+G\*)= -380.980068

|   |           |           |           |
|---|-----------|-----------|-----------|
| C | 0.011059  | 0.010404  | -0.009232 |
| N | 0.010199  | 0.007981  | 1.379504  |
| C | 1.252890  | -0.008065 | 1.999421  |
| C | 2.431421  | 0.000557  | 1.282173  |
| C | 2.431486  | 0.015356  | -0.117269 |
| C | 1.179678  | 0.018379  | -0.742721 |
| C | -1.148988 | 0.079798  | 2.096341  |
| H | -1.079255 | -0.145825 | 3.152669  |
| C | -1.212266 | 3.367470  | 2.035373  |
| N | -1.171204 | 4.522889  | 1.953016  |
| H | 1.223554  | -0.018440 | 3.081750  |
| H | 3.361279  | -0.008313 | 1.843388  |
| H | 3.353370  | 0.023694  | -0.687151 |
| H | 1.093270  | 0.024733  | -1.825382 |
| H | -0.970240 | 0.015096  | -0.466909 |
| H | -1.257472 | 2.276840  | 2.115163  |
| H | -2.063065 | -0.141154 | 1.560424  |

**A = F-**

E(B3LYP/6-31+G\*)= -388.008226

|   |           |           |           |
|---|-----------|-----------|-----------|
| C | -0.003567 | 0.031878  | 0.041312  |
| N | -0.034280 | 0.052980  | 1.414206  |
| C | 1.167572  | 0.019153  | 2.077935  |
| C | 2.373206  | -0.048216 | 1.405905  |
| C | 2.408455  | -0.076653 | 0.008705  |
| C | 1.183324  | -0.035323 | -0.663296 |
| C | -1.250129 | -0.002965 | 2.112998  |
| H | 1.097066  | 0.028350  | 3.158334  |
| H | 3.285493  | -0.076771 | 1.993521  |
| H | 3.347298  | -0.130107 | -0.531477 |
| H | 1.134193  | -0.053431 | -1.747563 |
| H | -0.972721 | 0.050894  | -0.441061 |
| H | -1.167467 | 0.388053  | 3.124178  |
| H | -2.080445 | 0.397426  | 1.536404  |
| H | -1.558521 | -1.582107 | 2.281163  |
| F | -1.689172 | -2.595119 | 2.350151  |

**A = CH<sub>3</sub>O-**

E(B3LYP/6-31+G\*)= -403.277117

|   |           |           |           |
|---|-----------|-----------|-----------|
| C | 0.029488  | -0.148705 | -0.112034 |
| C | -0.051521 | -0.145449 | 1.265005  |
| N | 1.070794  | -0.022966 | 2.069825  |
| C | 2.292804  | 0.069859  | 1.421122  |
| C | 2.395506  | 0.068747  | 0.045528  |
| C | 1.261394  | -0.039980 | -0.767318 |
| C | 0.972235  | 0.060427  | 3.432175  |
| H | 1.889341  | -0.098745 | 3.985305  |
| O | 0.632142  | 3.081856  | 3.698083  |
| H | 3.150884  | 0.163414  | 2.074641  |
| H | 3.389010  | 0.152710  | -0.385297 |
| H | 1.333534  | -0.039766 | -1.848893 |
| H | -0.897388 | -0.240923 | -0.670676 |
| H | -0.990799 | -0.216329 | 1.798668  |
| H | 0.757189  | 2.103184  | 3.651073  |
| H | 0.034065  | -0.269694 | 3.860609  |
| C | 0.398149  | 3.446810  | 5.047600  |
| H | 0.259060  | 4.532055  | 5.069090  |
| H | -0.509583 | 2.975114  | 5.456764  |
| H | 1.247921  | 3.195412  | 5.702179  |

**A = OH-**

E(B3LYP/6-31+G\*)= -363.974771

|   |           |           |           |
|---|-----------|-----------|-----------|
| C | -0.007380 | -0.059634 | -0.044025 |
| N | -0.044539 | -0.006099 | 1.340724  |
| C | 1.176399  | 0.077059  | 1.991918  |
| C | 2.372193  | 0.128885  | 1.306115  |
| C | 2.409379  | 0.087340  | -0.092249 |
| C | 1.177284  | -0.009098 | -0.748920 |
| C | -1.228430 | 0.022290  | 2.027268  |
| H | -1.166345 | -0.188997 | 3.087436  |
| O | -1.589475 | 3.055309  | 1.996158  |
| H | 1.115974  | 0.119443  | 3.072019  |
| H | 3.285042  | 0.201197  | 1.890176  |
| H | 3.344490  | 0.129564  | -0.638884 |
| H | 1.120354  | -0.048706 | -1.832826 |
| H | -0.975319 | -0.121762 | -0.524914 |
| H | -1.532530 | 2.069920  | 2.047795  |
| H | -2.103666 | -0.297514 | 1.475804  |
| H | -2.402499 | 3.288788  | 2.468455  |



**A = H-**

E(B3LYP/6-31+G\*)= -288.720661

|   |           |           |           |
|---|-----------|-----------|-----------|
| C | 0.003752  | -0.045846 | 0.066993  |
| C | -0.012013 | 0.133420  | 1.433050  |
| N | 1.162310  | 0.243354  | 2.183343  |
| C | 2.357830  | 0.146393  | 1.465434  |
| C | 2.381365  | -0.032828 | 0.099485  |
| C | 1.203122  | -0.133467 | -0.652125 |
| C | 1.143139  | 0.422773  | 3.514188  |
| H | 1.159912  | -3.223276 | 3.439331  |
| H | 3.255268  | 0.227586  | 2.065598  |
| H | 3.355917  | -0.094569 | -0.377384 |
| H | 1.218575  | -0.274363 | -1.726476 |
| H | -0.956670 | -0.118180 | -0.436320 |
| H | -0.926352 | 0.204708  | 2.008448  |
| H | 2.081457  | 0.514344  | 4.039734  |
| H | 0.189865  | 0.504009  | 4.013880  |
| H | 1.155213  | -2.491096 | 3.576990  |

**XYZ coordinates and total energies of type 5d species at the B3LYP/6-31+G\* level**

**A = ClCH<sub>2</sub>COO- (isomer 1)**

E(B3LYP/6-31+G\*)= -976.264549

|    |           |           |           |
|----|-----------|-----------|-----------|
| N  | 0.000962  | -0.004778 | 0.008205  |
| C  | 0.004974  | 0.040875  | 1.388670  |
| C  | 1.143658  | 0.058335  | 2.116908  |
| C  | 2.474496  | -0.115005 | 1.482281  |
| C  | 2.399934  | 0.065844  | 0.009147  |
| C  | 1.216754  | 0.047313  | -0.645485 |
| O  | 2.912649  | -1.559378 | 1.803515  |
| C  | 4.210476  | -1.816993 | 1.754003  |
| O  | 5.089007  | -1.027729 | 1.445406  |
| C  | -1.241982 | -0.180088 | -0.731084 |
| C  | 4.580051  | -3.267699 | 2.053998  |
| Cl | 3.453716  | -4.165130 | 3.141222  |
| H  | -1.486462 | -1.241350 | -0.871988 |
| H  | -0.975108 | 0.107907  | 1.851189  |
| H  | 1.080821  | 0.155469  | 3.195720  |
| H  | 3.261502  | 0.483303  | 1.943933  |
| H  | 3.320945  | 0.175271  | -0.552890 |
| H  | 1.155919  | 0.119046  | -1.727354 |
| H  | -2.062395 | 0.300422  | -0.189938 |
| H  | -1.155233 | 0.294189  | -1.712990 |
| H  | 4.619513  | -3.815003 | 1.108088  |
| H  | 5.569304  | -3.278444 | 2.510786  |

**A = ClCH<sub>2</sub>COO- (isomer 2)**

E(B3LYP/6-31+G\*)= -976.260939

|    |           |           |           |
|----|-----------|-----------|-----------|
| C  | -0.039370 | 0.139376  | -0.067461 |
| C  | -0.060111 | 0.073112  | 1.283226  |
| C  | 1.194371  | -0.061453 | 2.060766  |
| C  | 2.377995  | 0.322242  | 1.254849  |
| C  | 2.313677  | 0.381112  | -0.094995 |
| N  | 1.131444  | 0.238801  | -0.787397 |
| O  | 1.344048  | -1.501961 | 2.638977  |
| C  | 1.400653  | -2.558796 | 1.834052  |
| C  | 1.482387  | -3.860337 | 2.631263  |
| C  | 1.130238  | 0.079962  | -2.236453 |
| O  | 1.417741  | -2.557005 | 0.616433  |
| H  | 1.230637  | -0.974498 | -2.521635 |
| H  | -0.949156 | 0.157262  | -0.659885 |
| H  | -1.012317 | 0.065593  | 1.803446  |
| H  | 1.153381  | 0.446602  | 3.025865  |
| H  | 3.322553  | 0.515429  | 1.753214  |
| H  | 3.186782  | 0.584500  | -0.707812 |
| H  | 0.195552  | 0.472281  | -2.647790 |
| H  | 1.960881  | 0.646028  | -2.668161 |
| H  | 2.264318  | -3.804541 | 3.390656  |
| Cl | -0.068907 | -4.216219 | 3.501597  |
| H  | 1.664038  | -4.684866 | 1.943617  |

**A = CH<sub>3</sub>COO- (isomer 1)**

E(B3LYP/6-31+G\*)= -516.676519

|   |           |           |           |
|---|-----------|-----------|-----------|
| C | -0.003682 | -0.003538 | -0.018095 |
| C | -0.022003 | 0.015989  | 1.471028  |
| C | 1.362857  | 0.050645  | 2.022707  |
| C | 2.440327  | -0.224335 | 1.255617  |
| N | 2.357003  | -0.428053 | -0.110425 |
| C | 1.122568  | -0.275063 | -0.713137 |
| O | -0.721184 | -1.260131 | 1.908328  |
| C | -1.269224 | -1.267456 | 3.136412  |
| O | -1.229674 | -0.328557 | 3.913069  |
| C | 3.510184  | -0.886877 | -0.870488 |
| H | 3.584743  | -1.983012 | -0.882459 |
| C | -1.932813 | -2.594895 | 3.436137  |
| H | 1.128051  | -0.342320 | -1.797111 |
| H | -0.929086 | 0.168616  | -0.558437 |
| H | -0.651692 | 0.807480  | 1.882602  |
| H | 1.497715  | 0.267107  | 3.076914  |
| H | 3.446052  | -0.255976 | 1.664528  |
| H | 3.436130  | -0.529818 | -1.902108 |
| H | 4.426000  | -0.478419 | -0.432518 |
| H | -2.645604 | -2.853306 | 2.646104  |
| H | -1.176305 | -3.387386 | 3.465658  |
| H | -2.442877 | -2.540155 | 4.399572  |

**A = CH<sub>3</sub>COO- (isomer 2)**

E(B3LYP/6-31+G\*)= -516.672250

|   |           |           |           |
|---|-----------|-----------|-----------|
| C | 0.040824  | 0.080206  | -0.098501 |
| C | -0.005544 | -0.078251 | 1.379497  |
| C | 1.359530  | -0.025398 | 1.967313  |
| C | 2.457731  | -0.222954 | 1.205015  |
| N | 2.399104  | -0.331124 | -0.168425 |
| C | 1.185356  | -0.121082 | -0.788222 |
| O | -0.752727 | -1.355236 | 1.791159  |
| C | -0.296451 | -2.570009 | 1.437577  |
| O | 0.708288  | -2.788233 | 0.785253  |
| C | 3.551938  | -0.795003 | -0.928031 |
| H | 3.571140  | -1.889988 | -0.996088 |
| C | -1.211455 | -3.659215 | 1.965021  |
| H | 1.221212  | -0.088758 | -1.873258 |
| H | -0.872363 | 0.314766  | -0.636420 |
| H | -0.688570 | 0.631806  | 1.851815  |
| H | 1.471991  | 0.127024  | 3.036146  |
| H | 3.456749  | -0.267729 | 1.628797  |
| H | 3.518358  | -0.376713 | -1.938636 |
| H | 4.472111  | -0.452837 | -0.444683 |
| H | -1.279736 | -3.599997 | 3.056853  |
| H | -2.223851 | -3.527484 | 1.567469  |
| H | -0.822631 | -4.636030 | 1.670739  |

**A = SH- (isomer 1)**

E(B3LYP/6-31+G\*)= -686.971434

|   |           |           |           |
|---|-----------|-----------|-----------|
| C | 0.011147  | -0.035275 | 0.014109  |
| C | 0.009818  | -0.052425 | 1.363870  |
| N | 1.174118  | -0.058220 | 2.122817  |
| C | 2.373054  | 0.123725  | 1.443768  |
| C | 2.459850  | 0.147222  | 0.096899  |
| C | 1.275362  | -0.099894 | -0.780053 |
| C | 1.105328  | 0.214806  | 3.551604  |
| H | 1.015934  | 1.290742  | 3.765900  |
| S | 1.431645  | -1.773086 | -1.714813 |
| H | 3.245711  | 0.253826  | 2.076567  |
| H | 3.431983  | 0.283548  | -0.365842 |
| H | 1.253721  | 0.580408  | -1.639357 |
| H | -0.937170 | -0.042049 | -0.513534 |
| H | -0.913004 | -0.056127 | 1.935959  |
| H | 0.242219  | -0.301531 | 3.981493  |
| H | 2.006297  | -0.166677 | 4.040531  |
| H | 1.451124  | -2.538586 | -0.602359 |

**A = SH- (isomer 2)**

E(B3LYP/6-31+G\*)= -686.968547

|   |           |           |           |
|---|-----------|-----------|-----------|
| C | 0.006977  | 0.077382  | -0.021162 |
| C | -0.001261 | 0.182000  | 1.324427  |
| N | 1.159572  | 0.236632  | 2.081356  |
| C | 2.368411  | 0.255612  | 1.404451  |
| C | 2.459593  | 0.156350  | 0.060929  |
| C | 1.268244  | -0.120283 | -0.797624 |
| C | 1.112773  | 0.128486  | 3.530044  |
| H | 1.117760  | -0.917723 | 3.868065  |
| S | 1.417877  | -1.926371 | -1.485659 |
| H | 3.244168  | 0.403714  | 2.029467  |
| H | 3.435605  | 0.230798  | -0.407599 |
| H | 1.287630  | 0.474776  | -1.715855 |
| H | -0.940113 | 0.091492  | -0.551754 |
| H | -0.924308 | 0.267436  | 1.890141  |
| H | 0.205898  | 0.612452  | 3.906292  |
| H | 1.977373  | 0.639680  | 3.964696  |
| H | 0.748743  | -1.714995 | -2.642839 |

**A = CN-**

E(B3LYP/6-31+G\*)= -381.020476

|   |           |           |           |
|---|-----------|-----------|-----------|
| C | 0.002747  | 0.104735  | 0.020876  |
| C | 0.010714  | 0.088614  | 1.365338  |
| N | 1.170937  | 0.107835  | 2.131806  |
| C | 2.375107  | -0.038865 | 1.451931  |
| C | 2.482641  | -0.028850 | 0.111655  |
| C | 1.282480  | 0.189195  | -0.795745 |
| C | 1.101526  | -0.214965 | 3.550763  |
| H | 1.036534  | -1.298798 | 3.731166  |
| C | 1.378723  | 1.493294  | -1.505238 |
| H | 3.246988  | -0.169986 | 2.085679  |
| H | 3.460642  | -0.136981 | -0.345173 |
| H | 1.271014  | -0.570496 | -1.594476 |
| H | -0.945317 | 0.100479  | -0.506540 |
| H | -0.914011 | 0.054451  | 1.933472  |
| H | 1.990339  | 0.173000  | 4.056408  |
| H | 0.224913  | 0.268104  | 3.991635  |
| N | 1.453904  | 2.512248  | -2.059593 |

**A = F-**

E(B3LYP/6-31+G\*)= -388.033693

|   |           |           |           |
|---|-----------|-----------|-----------|
| C | 0.000299  | -0.000045 | 0.000043  |
| C | 0.000213  | 0.012672  | 1.352909  |
| N | 1.162098  | 0.026592  | 2.099663  |
| C | 2.363052  | -0.086505 | 1.426811  |
| C | 2.446296  | -0.102713 | 0.076546  |
| C | 1.256142  | 0.122348  | -0.778672 |
| C | 1.109875  | -0.138693 | 3.547513  |
| H | 1.056354  | -1.197496 | 3.837509  |
| F | 1.330734  | 1.491867  | -1.325676 |
| H | 3.239734  | -0.183535 | 2.059960  |
| H | 3.419565  | -0.206418 | -0.391962 |
| H | 1.259753  | -0.474590 | -1.695250 |
| H | -0.947106 | -0.023132 | -0.528537 |
| H | -0.919299 | -0.008963 | 1.929879  |
| H | 2.000703  | 0.306318  | 3.998740  |
| H | 0.233032  | 0.380530  | 3.943454  |

**A = CH<sub>3</sub>O- (isomer 1)**

E(B3LYP/6-31+G\*)= -403.305154

|   |           |           |           |
|---|-----------|-----------|-----------|
| C | -0.026304 | 0.048188  | 0.042777  |
| C | -0.007114 | 0.027719  | 1.392945  |
| N | 1.164134  | -0.027195 | 2.129836  |
| C | 2.359762  | 0.082131  | 1.435394  |
| C | 2.427844  | 0.101600  | 0.088497  |
| C | 1.223423  | -0.104854 | -0.776925 |
| C | 1.134295  | 0.195229  | 3.568380  |
| H | 1.118146  | 1.265543  | 3.823253  |
| O | 1.342597  | -1.441331 | -1.358365 |
| H | 3.245727  | 0.167138  | 2.057779  |
| H | 3.398257  | 0.187557  | -0.390130 |
| H | 1.225100  | 0.590935  | -1.633312 |
| H | -0.987405 | 0.117088  | -0.457760 |
| H | -0.918340 | 0.073379  | 1.982654  |
| H | 0.245947  | -0.280209 | 3.993745  |
| H | 2.015346  | -0.261762 | 4.028105  |
| C | 0.501850  | -1.666133 | -2.474432 |
| H | 0.764648  | -2.648354 | -2.877378 |
| H | -0.564497 | -1.673820 | -2.200367 |
| H | 0.658716  | -0.905782 | -3.258285 |

**A = CH<sub>3</sub>O- (isomer 2)**

E(B3LYP/6-31+G\*)= -403.306220

|   |           |           |           |
|---|-----------|-----------|-----------|
| C | -0.001586 | 0.036616  | 0.044232  |
| C | -0.003411 | 0.039966  | 1.394030  |
| N | 1.159545  | 0.010218  | 2.151173  |
| C | 2.365614  | 0.115998  | 1.472331  |
| C | 2.453050  | 0.115404  | 0.125362  |
| C | 1.259067  | -0.089208 | -0.763289 |
| C | 1.103518  | 0.284435  | 3.580427  |
| H | 1.061972  | 1.362687  | 3.795382  |
| O | 1.323863  | -1.355738 | -1.493468 |
| H | 3.241469  | 0.214190  | 2.107623  |
| H | 3.431755  | 0.204947  | -0.337263 |
| H | 1.264059  | 0.617913  | -1.601084 |
| H | -0.951363 | 0.064254  | -0.482133 |
| H | -0.923752 | 0.080506  | 1.969953  |
| H | 0.218553  | -0.193324 | 4.010512  |
| H | 1.986805  | -0.136857 | 4.069006  |
| C | 1.335674  | -2.534855 | -0.703723 |
| H | 1.385753  | -3.370174 | -1.407735 |
| H | 2.209975  | -2.575366 | -0.038065 |
| H | 0.423822  | -2.632756 | -0.097025 |

**A = OH- (isomer 1)**

E(B3LYP/6-31+G\*)= -363.999286

|   |           |           |           |
|---|-----------|-----------|-----------|
| C | -0.004713 | -0.025054 | 0.002366  |
| N | -0.006284 | -0.050560 | 1.387076  |
| C | 1.223065  | -0.032287 | 2.028199  |
| C | 2.397293  | -0.123616 | 1.370215  |
| C | 2.468356  | -0.362053 | -0.105333 |
| C | 1.126635  | -0.110193 | -0.729860 |
| C | -1.216977 | 0.284193  | 2.123321  |
| H | -1.353091 | 1.371123  | 2.227504  |
| O | 2.897900  | -1.752988 | -0.289089 |
| H | 1.175876  | 0.076194  | 3.107747  |
| H | 3.323175  | -0.107237 | 1.936334  |
| H | 3.246427  | 0.264858  | -0.567697 |
| H | 1.050671  | -0.063290 | -1.813247 |
| H | -0.982745 | 0.087174  | -0.456630 |
| H | -2.086405 | -0.130188 | 1.605192  |
| H | -1.173947 | -0.161412 | 3.121277  |
| H | 3.137213  | -1.876916 | -1.223456 |

**A = OH- (isomer 2)**

E(B3LYP/6-31+G\*)= -364.003519

|   |           |           |           |
|---|-----------|-----------|-----------|
| C | 0.004418  | -0.081280 | 0.033563  |
| N | -0.012071 | -0.048397 | 1.420217  |
| C | 1.211379  | -0.017665 | 2.073127  |
| C | 2.394278  | -0.109109 | 1.426961  |
| C | 2.492974  | -0.343152 | -0.053003 |
| C | 1.142662  | -0.175093 | -0.688043 |
| C | -1.227553 | 0.328395  | 2.127777  |
| H | -1.360410 | 1.419505  | 2.172980  |
| O | 3.048435  | -1.662720 | -0.340500 |
| H | 1.152240  | 0.092805  | 3.152129  |
| H | 3.313075  | -0.085326 | 2.005318  |
| H | 3.241376  | 0.310529  | -0.516346 |
| H | 1.078040  | -0.203114 | -1.771692 |
| H | -0.972251 | -0.019191 | -0.437813 |
| H | -2.094794 | -0.109667 | 1.625235  |
| H | -1.193585 | -0.063052 | 3.148654  |
| H | 2.439240  | -2.317972 | 0.040311  |

**A = H-**

E(B3LYP/6-31+G\*)= -288.778005

|   |           |           |           |
|---|-----------|-----------|-----------|
| C | 0.022727  | -0.199803 | 0.079438  |
| N | 0.001191  | -0.015838 | 1.465982  |
| C | 1.235663  | -0.076313 | 2.121097  |
| C | 2.380068  | -0.445966 | 1.520840  |
| C | 2.452541  | -0.832325 | 0.059001  |
| C | 1.116967  | -0.574614 | -0.605221 |
| C | -1.061740 | 0.787808  | 2.048822  |
| H | 1.201294  | 0.184213  | 3.175382  |
| H | 3.285598  | -0.492341 | 2.120032  |
| H | 2.741421  | -1.893794 | -0.048377 |
| H | 1.028951  | -0.722115 | -1.678381 |
| H | -0.930998 | -0.032955 | -0.413650 |
| H | -2.020722 | 0.502252  | 1.605113  |
| H | -1.117126 | 0.595095  | 3.124857  |
| H | -0.912452 | 1.869329  | 1.894003  |
| H | 3.254135  | -0.272015 | -0.451159 |



**XYZ coordinates and total energies of type 5e species at the B3LYP/6-31+G\* level**

**A = ClCH<sub>2</sub>COO- (isomer 1)**

E(B3LYP/6-31+G\*)= -976.267621

|    |           |           |           |
|----|-----------|-----------|-----------|
| C  | 0.001953  | -0.014049 | 0.173932  |
| C  | 0.143855  | 0.135965  | 1.519112  |
| C  | 1.475416  | 0.226962  | 2.050126  |
| C  | 2.554122  | 0.038922  | 1.248467  |
| C  | 2.376771  | -0.377172 | -0.157812 |
| N  | 1.087388  | -0.101048 | -0.668252 |
| O  | 2.552907  | -1.946905 | -0.257062 |
| C  | 3.788921  | -2.398128 | -0.416289 |
| C  | 3.849489  | -3.915620 | -0.563602 |
| C  | 0.886341  | -0.254607 | -2.107873 |
| O  | 4.801787  | -1.716343 | -0.416075 |
| H  | 0.851768  | -1.311018 | -2.398840 |
| H  | -0.966314 | -0.020320 | -0.316163 |
| H  | -0.730121 | 0.239683  | 2.151281  |
| H  | 1.615543  | 0.480832  | 3.098186  |
| H  | 3.572660  | 0.125350  | 1.611193  |
| H  | 3.155563  | -0.025021 | -0.833449 |
| H  | -0.047269 | 0.233678  | -2.398576 |
| H  | 1.710371  | 0.229868  | -2.641457 |
| Cl | 2.919392  | -4.508216 | -2.002385 |
| H  | 4.887322  | -4.216539 | -0.696842 |
| H  | 3.416463  | -4.399962 | 0.314220  |

**A = ClCH<sub>2</sub>COO- (isomer 2)**

E(B3LYP/6-31+G\*)= -976.266443

|    |           |           |           |
|----|-----------|-----------|-----------|
| C  | -0.007350 | 0.035156  | -0.012838 |
| C  | -0.017261 | 0.016163  | 1.348157  |
| C  | 1.245481  | -0.017885 | 2.030502  |
| C  | 2.401053  | -0.165154 | 1.334746  |
| C  | 2.372508  | -0.416781 | -0.120284 |
| N  | 1.164649  | -0.008067 | -0.733890 |
| O  | 2.534084  | -1.986945 | -0.281187 |
| C  | 3.374678  | -2.437087 | -1.206503 |
| C  | 3.580594  | -3.945854 | -1.106505 |
| C  | 1.121062  | 0.063197  | -2.193811 |
| O  | 3.926577  | -1.764943 | -2.063344 |
| H  | 1.003376  | -0.929799 | -2.645601 |
| H  | -0.911772 | 0.140288  | -0.603724 |
| H  | -0.954397 | 0.088581  | 1.887467  |
| H  | 1.273245  | 0.109773  | 3.109888  |
| H  | 3.371113  | -0.169082 | 1.820791  |
| H  | 3.232525  | -0.046429 | -0.674703 |
| H  | 0.286052  | 0.698938  | -2.499312 |
| H  | 2.051562  | 0.498549  | -2.564969 |
| Cl | 4.634929  | -4.363271 | 0.307409  |
| H  | 2.630841  | -4.461842 | -0.957717 |
| H  | 4.085299  | -4.299942 | -2.004151 |

**A = CH<sub>3</sub>COO- (isomer 1)**

E(B3LYP/6-31+G\*)= -516.679175

|   |           |           |           |
|---|-----------|-----------|-----------|
| C | -0.014040 | 0.032854  | -0.001844 |
| C | -0.036887 | 0.022161  | 1.436600  |
| C | 1.117778  | 0.017175  | 2.146533  |
| C | 2.426868  | -0.104830 | 1.456763  |
| N | 2.365419  | 0.285021  | 0.089262  |
| C | 1.189571  | 0.177354  | -0.619193 |
| O | 2.878767  | -1.579252 | 1.473805  |
| C | 3.564077  | -1.991419 | 2.553231  |
| O | 3.844451  | -1.274706 | 3.499965  |
| C | 3.629724  | 0.457465  | -0.617629 |
| H | 4.097839  | -0.505435 | -0.859386 |
| C | 3.931159  | -3.456720 | 2.457201  |
| H | 1.286750  | 0.271577  | -1.696354 |
| H | -0.925473 | -0.010199 | -0.586515 |
| H | -0.992939 | 0.052604  | 1.954229  |
| H | 1.135115  | 0.038529  | 3.231084  |
| H | 3.239496  | 0.411038  | 1.968612  |
| H | 3.458086  | 1.015109  | -1.542287 |
| H | 4.319373  | 1.033179  | 0.008360  |
| H | 3.022212  | -4.065407 | 2.528128  |
| H | 4.397274  | -3.677284 | 1.491514  |
| H | 4.607733  | -3.719388 | 3.272533  |

**A = CH<sub>3</sub>COO- (isomer 2)**

E(B3LYP/6-31+G\*)= -516.679106

|   |           |           |           |
|---|-----------|-----------|-----------|
| C | -0.007147 | 0.002845  | 0.031339  |
| C | 0.056748  | -0.073701 | 1.465518  |
| C | 1.252469  | -0.067698 | 2.104299  |
| C | 2.521530  | -0.112622 | 1.335817  |
| N | 2.362649  | 0.347191  | -0.004408 |
| C | 1.151900  | 0.226308  | -0.646586 |
| O | 2.973994  | -1.585311 | 1.319714  |
| C | 4.264137  | -1.859940 | 1.586140  |
| O | 5.124761  | -1.017721 | 1.782701  |
| C | 3.570544  | 0.622682  | -0.778388 |
| H | 4.041244  | -0.299153 | -1.145015 |
| C | 4.513232  | -3.352221 | 1.626250  |
| H | 1.180041  | 0.376842  | -1.721518 |
| H | -0.949767 | -0.048469 | -0.500814 |
| H | -0.866444 | -0.099281 | 2.039862  |
| H | 1.327703  | -0.090669 | 3.186970  |
| H | 3.355691  | 0.401703  | 1.810833  |
| H | 3.317713  | 1.258420  | -1.631267 |
| H | 4.293619  | 1.147580  | -0.149170 |
| H | 4.008253  | -3.782622 | 2.498827  |
| H | 4.095573  | -3.836000 | 0.737540  |
| H | 5.585405  | -3.545073 | 1.694983  |

**A = CH<sub>3</sub>COO- (isomer 3)**

E(B3LYP/6-31+G\*)= -516.673105

|   |           |           |           |
|---|-----------|-----------|-----------|
| C | -0.021415 | 0.335480  | 0.090438  |
| C | 0.019916  | 0.434693  | 1.444922  |
| C | 1.275575  | 0.200896  | 2.097321  |
| C | 2.362491  | -0.196400 | 1.389530  |
| C | 2.277812  | -0.475869 | -0.062147 |
| N | 1.095010  | 0.041205  | -0.659008 |
| O | 2.497370  | -1.994152 | -0.348757 |
| C | 1.579652  | -2.913587 | 0.004005  |
| C | 2.097455  | -4.318058 | -0.240238 |
| C | 0.992103  | -0.035814 | -2.111197 |
| O | 0.478031  | -2.664574 | 0.455804  |
| H | 0.729462  | -1.046827 | -2.448603 |
| H | -0.924884 | 0.519213  | -0.481993 |
| H | -0.871443 | 0.698913  | 2.001228  |
| H | 1.360472  | 0.365729  | 3.169051  |
| H | 3.327883  | -0.354574 | 1.860363  |
| H | 3.154351  | -0.139315 | -0.622616 |
| H | 0.230839  | 0.666103  | -2.461946 |
| H | 1.952906  | 0.240246  | -2.558638 |
| H | 2.485937  | -4.416877 | -1.259139 |
| H | 2.925634  | -4.528158 | 0.446503  |
| H | 1.294434  | -5.038390 | -0.072179 |

**A = SH- (isomer 1)**

E(B3LYP/6-31+G\*)= -686.972658

|   |           |           |           |
|---|-----------|-----------|-----------|
| C | 0.027005  | 0.007081  | -0.004322 |
| C | 0.026375  | 0.024826  | 1.482089  |
| N | 1.361952  | 0.023324  | 2.012707  |
| C | 2.368548  | -0.625904 | 1.336438  |
| C | 2.267645  | -0.925398 | 0.011875  |
| C | 1.079883  | -0.503459 | -0.687836 |
| S | -1.081204 | -1.448026 | 2.180458  |
| C | 1.514582  | 0.341549  | 3.425386  |
| H | 1.038885  | 1.306070  | 3.637744  |
| H | 3.263797  | -0.833566 | 1.914750  |
| H | 3.092444  | -1.403703 | -0.503319 |
| H | 1.043809  | -0.574913 | -1.772213 |
| H | -0.878976 | 0.335215  | -0.503960 |
| H | -0.522695 | 0.873364  | 1.897579  |
| H | 1.050270  | -0.424508 | 4.060248  |
| H | 2.576986  | 0.421626  | 3.668255  |
| H | -0.470578 | -2.395554 | 1.437326  |

**A = SH- (isomer 2)**

E(B3LYP/6-31+G\*)= -686.969976

|   |           |           |           |
|---|-----------|-----------|-----------|
| C | 0.034449  | -0.014372 | -0.134871 |
| C | -0.021937 | -0.052778 | 1.349256  |
| N | 1.289404  | -0.090208 | 1.930310  |
| C | 2.344773  | 0.525989  | 1.295118  |
| C | 2.307605  | 0.829942  | -0.030032 |
| C | 1.129421  | 0.461011  | -0.774631 |
| S | -1.102158 | 1.498642  | 1.954070  |
| C | 1.376552  | -0.379355 | 3.353619  |
| H | 0.997616  | 0.455542  | 3.959640  |
| H | 3.221186  | 0.704415  | 1.910618  |
| H | 3.167279  | 1.280983  | -0.511490 |
| H | 1.134303  | 0.543075  | -1.858812 |
| H | -0.866059 | -0.297310 | -0.670506 |
| H | -0.609332 | -0.890808 | 1.729984  |
| H | 0.785966  | -1.274025 | 3.581685  |
| H | 2.416878  | -0.576711 | 3.624229  |
| H | -1.688966 | 0.884310  | 3.007147  |

**A = CN-**

E(B3LYP/6-31+G\*)= -381.015856

|   |           |           |           |
|---|-----------|-----------|-----------|
| C | 0.025677  | -0.015900 | 0.020541  |
| C | 0.021371  | -0.049738 | 1.378292  |
| N | 1.187796  | -0.025730 | 2.118676  |
| C | 2.382793  | 0.551083  | 1.507338  |
| C | 2.448678  | 0.195247  | 0.033857  |
| C | 1.306151  | -0.007021 | -0.653787 |
| C | 1.127426  | 0.014191  | 3.572455  |
| H | 0.251052  | -0.542140 | 3.914792  |
| C | 2.443984  | 2.045177  | 1.712221  |
| H | 3.256419  | 0.147451  | 2.035846  |
| H | 3.427858  | 0.178814  | -0.433573 |
| H | 1.345816  | -0.211813 | -1.721128 |
| H | -0.904107 | -0.085213 | -0.531109 |
| H | -0.891342 | -0.169542 | 1.954660  |
| H | 2.020369  | -0.464740 | 3.989709  |
| H | 1.070120  | 1.043546  | 3.958986  |
| N | 2.494097  | 3.194368  | 1.878073  |

**A = F-**

E(B3LYP/6-31+G\*)= -388.038975

|   |           |           |           |
|---|-----------|-----------|-----------|
| C | -0.003844 | 0.108733  | 0.000881  |
| C | -0.002929 | 0.076300  | 1.361618  |
| N | 1.158182  | -0.056322 | 2.087522  |
| C | 2.425051  | 0.161650  | 1.486883  |
| C | 2.417375  | -0.050661 | 0.024358  |
| C | 1.255597  | -0.012799 | -0.676412 |
| C | 1.104262  | -0.060814 | 3.547758  |
| H | 1.932996  | -0.660736 | 3.937358  |
| F | 2.847888  | 1.560824  | 1.759321  |
| H | 3.198612  | -0.393470 | 2.023459  |
| H | 3.380222  | -0.162436 | -0.463486 |
| H | 1.271607  | -0.103149 | -1.760041 |
| H | -0.939084 | 0.174927  | -0.542519 |
| H | -0.915716 | 0.105023  | 1.948282  |
| H | 1.184412  | 0.952634  | 3.958181  |
| H | 0.164936  | -0.513245 | 3.876625  |

**A = CH<sub>3</sub>O- (isomer 1)**

E(B3LYP/6-31+G\*)= -403.308940

|   |           |           |           |
|---|-----------|-----------|-----------|
| C | 0.159486  | 0.050672  | -0.047261 |
| C | -0.058469 | 0.222409  | 1.285419  |
| N | 0.963973  | 0.244397  | 2.202728  |
| C | 2.262632  | -0.284377 | 1.871348  |
| C | 2.536373  | -0.164287 | 0.402127  |
| C | 1.521748  | -0.078104 | -0.491700 |
| C | 0.663140  | 0.410347  | 3.619513  |
| H | -0.219836 | 1.046112  | 3.733183  |
| O | 2.294492  | -1.668178 | 2.340961  |
| H | 3.019393  | 0.249078  | 2.471041  |
| H | 3.572421  | -0.205283 | 0.079055  |
| H | 1.736416  | -0.062825 | -1.558394 |
| H | -0.668831 | 0.079370  | -0.745373 |
| H | -1.048616 | 0.406449  | 1.692159  |
| H | 0.485441  | -0.550527 | 4.117961  |
| H | 1.507679  | 0.905078  | 4.112152  |
| C | 3.595077  | -2.219407 | 2.436633  |
| H | 3.491510  | -3.197246 | 2.914448  |
| H | 4.061619  | -2.357201 | 1.450192  |
| H | 4.255143  | -1.588343 | 3.056279  |

**A = CH<sub>3</sub>O- (isomer 2)**

E(B3LYP/6-31+G\*)= -403.311164

|   |           |           |           |
|---|-----------|-----------|-----------|
| C | -0.032301 | 0.112596  | -0.072872 |
| C | -0.027192 | 0.015727  | 1.286142  |
| N | 1.131264  | 0.015457  | 2.021835  |
| C | 2.432242  | -0.199186 | 1.405265  |
| C | 2.398409  | 0.157418  | -0.050375 |
| C | 1.236038  | 0.243602  | -0.741448 |
| C | 1.078953  | -0.058076 | 3.476251  |
| H | 1.903790  | 0.527173  | 3.898722  |
| O | 2.936331  | -1.538385 | 1.652344  |
| H | 3.173188  | 0.395800  | 1.952297  |
| H | 3.361606  | 0.285142  | -0.536182 |
| H | 1.254473  | 0.447137  | -1.810433 |
| H | -0.970089 | 0.144062  | -0.614913 |
| H | -0.944633 | -0.025856 | 1.866986  |
| H | 0.136024  | 0.367439  | 3.831272  |
| H | 1.170567  | -1.088065 | 3.844257  |
| C | 2.187126  | -2.605437 | 1.081092  |
| H | 2.737735  | -3.521542 | 1.310360  |
| H | 1.181491  | -2.671683 | 1.520215  |
| H | 2.093169  | -2.501480 | -0.007199 |

**A = OH- (isomer 1)**

E(B3LYP/6-31+G\*)= -364.002988

|   |           |           |           |
|---|-----------|-----------|-----------|
| C | -0.000881 | -0.012431 | -0.017661 |
| N | -0.022309 | 0.095234  | 1.353308  |
| C | 1.207469  | 0.128013  | 2.123876  |
| C | 2.335018  | 0.674349  | 1.309098  |
| C | 2.298228  | 0.669207  | -0.044273 |
| C | 1.113533  | 0.256118  | -0.749679 |
| C | -1.242225 | -0.228257 | 2.077759  |
| H | -1.274781 | 0.348839  | 3.010004  |
| O | 1.594117  | -1.198547 | 2.591762  |
| H | 1.019454  | 0.734466  | 3.022287  |
| H | 3.216886  | 0.992364  | 1.856753  |
| H | 3.164946  | 1.003141  | -0.610603 |
| H | 1.084321  | 0.200373  | -1.831545 |
| H | -0.947439 | -0.282073 | -0.477421 |
| H | -2.113059 | 0.050041  | 1.477124  |
| H | -1.313439 | -1.296820 | 2.325425  |
| H | 1.226215  | -1.349770 | 3.477839  |

**A = OH- (isomer 2)**

E(B3LYP/6-31+G\*)= -364.008728

|   |           |           |           |
|---|-----------|-----------|-----------|
| C | 0.065156  | -0.097668 | 0.052940  |
| N | -0.016313 | 0.109949  | 1.405606  |
| C | 1.184039  | 0.244524  | 2.218671  |
| C | 2.313835  | 0.800995  | 1.408972  |
| C | 2.337458  | 0.675041  | 0.058093  |
| C | 1.204328  | 0.147324  | -0.655141 |
| C | -1.255137 | -0.178114 | 2.118348  |
| H | -1.371146 | 0.531683  | 2.945348  |
| O | 1.547977  | -1.010187 | 2.851039  |
| H | 0.934365  | 0.871537  | 3.080992  |
| H | 3.146237  | 1.228422  | 1.960108  |
| H | 3.209239  | 1.007537  | -0.501694 |
| H | 1.221045  | 0.008474  | -1.729667 |
| H | -0.852714 | -0.429352 | -0.424514 |
| H | -2.104183 | -0.057411 | 1.439787  |
| H | -1.264269 | -1.193760 | 2.533165  |
| H | 2.042803  | -1.533639 | 2.197278  |

**A = H-**

E(B3LYP/6-31+G\*)= -288.776593

|   |           |           |           |
|---|-----------|-----------|-----------|
| N | 0.003243  | -0.185265 | 0.016278  |
| C | 0.029843  | -0.061844 | 1.389503  |
| C | 1.191467  | 0.041195  | 2.088989  |
| C | 2.440548  | -0.036162 | 1.352467  |
| C | 2.442376  | 0.029717  | 0.005593  |
| C | 1.158246  | 0.319284  | -0.736418 |
| H | -0.936130 | -0.132737 | 1.883195  |
| H | 1.174203  | 0.070822  | 3.172339  |
| H | 3.368856  | -0.192357 | 1.897941  |
| H | 3.357956  | -0.060781 | -0.572744 |
| H | 1.038734  | 1.413030  | -0.921006 |
| C | -1.262477 | -0.095694 | -0.684037 |
| H | -1.215295 | -0.674255 | -1.613995 |
| H | -2.064094 | -0.508502 | -0.064686 |
| H | -1.517787 | 0.948180  | -0.942559 |
| H | 1.154537  | -0.161135 | -1.723109 |



### Structure, relative stability, XYZ coordinates and total energies of alternative H-bonded complexes between acids and the deprotonated **3** and **5**

H-bonded complexes of acetic acid, HF and water with **3** deprotonated at position 4 or the N-methyl groups, and **5** deprotonated at position 3 and 4 were attempted to be optimized. The structures that could be optimized are listed below, together with the relative and total energies, and XYZ coordinates.

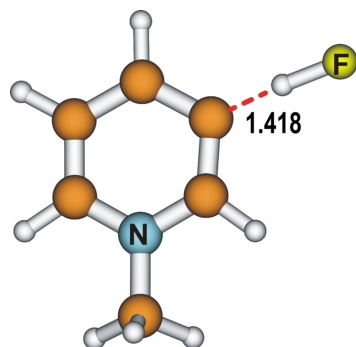

Relative stability compared to **5e**: 26.3 kcal mol<sup>-1</sup>

E(B3LYP/6-31+G\*)= -387.997050

|   |           |           |           |
|---|-----------|-----------|-----------|
| C | 0.004015  | 0.009925  | 0.000474  |
| C | 0.002872  | 0.012547  | 1.402944  |
| C | 1.210297  | 0.003685  | 2.078459  |
| N | 2.372366  | -0.012465 | 1.379858  |
| C | 2.357542  | -0.021126 | 0.013015  |
| C | 1.194348  | -0.009526 | -0.750198 |
| C | 3.655913  | 0.034156  | 2.104964  |
| H | 3.939767  | 1.074072  | 2.291024  |
| F | 1.459386  | -0.034038 | -3.270281 |
| H | 3.345105  | -0.039688 | -0.442416 |
| H | 1.306408  | -0.022150 | -2.163571 |
| H | -0.953642 | 0.021278  | -0.518574 |
| H | -0.918674 | 0.020321  | 1.978611  |
| H | 1.292699  | 0.008893  | 3.159349  |
| H | 4.424134  | -0.449724 | 1.500450  |
| H | 3.558969  | -0.496056 | 3.054148  |

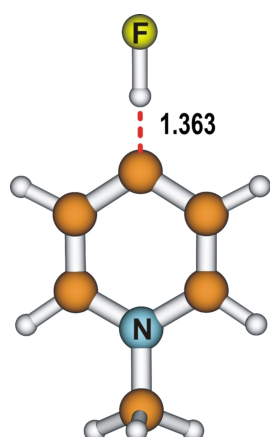

Relative stability compared to **5e**: 27.8 kcal mol<sup>-1</sup>

E(B3LYP/6-31+G\*)= -387.994671

|   |           |           |           |
|---|-----------|-----------|-----------|
| N | -0.033498 | -0.032174 | -0.000376 |
| C | -0.125326 | -0.016368 | 1.357650  |
| C | 1.013340  | 0.002721  | 2.138725  |
| C | 2.311020  | 0.008280  | 1.578249  |
| C | 2.342383  | -0.006159 | 0.165101  |
| C | 1.190397  | -0.025162 | -0.596178 |
| H | -1.133551 | -0.021539 | 1.760733  |
| H | 0.886582  | 0.009574  | 3.219254  |
| H | 3.441100  | 0.024210  | 2.339315  |
| H | 3.295958  | -0.006524 | -0.358684 |
| H | 1.184732  | -0.037042 | -1.681930 |
| C | -1.253893 | 0.010914  | -0.822506 |
| H | -2.064056 | -0.493931 | -0.293623 |
| H | -1.537822 | 1.049003  | -1.020456 |
| H | -1.071545 | -0.503556 | -1.767516 |
| F | 4.400615  | 0.037754  | 2.985833  |

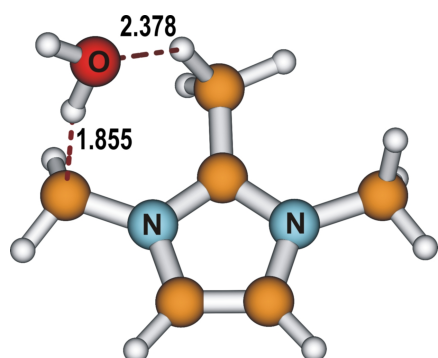

Relative stability compared to **3c**: 23.4 kcal mol<sup>-1</sup>

E(B3LYP/6-31+G\*)= -420.529950

|   |           |           |           |
|---|-----------|-----------|-----------|
| C | 0.158971  | 0.628530  | -0.119054 |
| N | -0.046816 | 0.343664  | 1.225376  |
| C | 1.146229  | 0.022273  | 1.765704  |
| N | 2.101287  | 0.098409  | 0.783507  |
| C | 1.488244  | 0.468602  | -0.390977 |
| C | 1.329968  | -0.435185 | 3.164794  |
| C | -1.317704 | 0.229253  | 1.876402  |
| C | 3.513939  | -0.203911 | 0.949799  |
| H | 3.955751  | 0.425053  | 1.729371  |
| H | 3.660459  | -1.257594 | 1.209480  |
| H | 4.023182  | -0.000569 | 0.005927  |
| H | 2.041373  | 0.597096  | -1.308732 |
| H | -0.661211 | 0.911168  | -0.759496 |
| H | -1.255623 | 0.620941  | 2.894611  |
| H | -2.067532 | 0.761847  | 1.289835  |
| H | -1.342605 | -1.608210 | 2.126503  |
| H | 1.053117  | 0.349009  | 3.883193  |
| H | 0.680053  | -1.302943 | 3.352022  |
| H | 2.367618  | -0.720366 | 3.356785  |
| O | -1.050026 | -2.565390 | 2.319733  |
| H | -1.861886 | -3.093732 | 2.334855  |

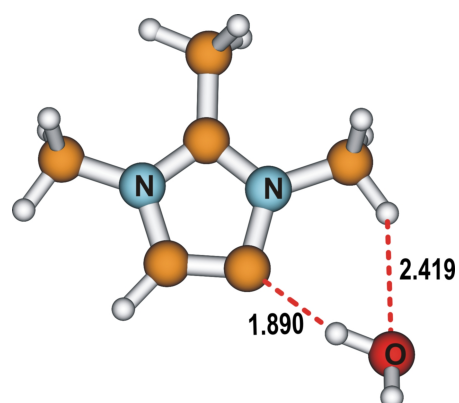

Relative stability compared to **3c**: 14.8 kcal mol<sup>-1</sup>

E(B3LYP/6-31+G\*)= -420.543625

|   |           |           |           |
|---|-----------|-----------|-----------|
| C | -0.403311 | 0.050663  | 0.154742  |
| N | -0.188488 | 0.052237  | 1.539441  |
| C | 1.139535  | -0.000188 | 1.749575  |
| N | 1.721506  | -0.034255 | 0.531226  |
| C | 0.791815  | -0.002773 | -0.529413 |
| C | 3.169666  | -0.087188 | 0.333217  |
| C | -1.222697 | 0.102174  | 2.565218  |
| H | 3.353107  | -0.144557 | -0.740427 |
| H | 3.647465  | 0.812984  | 0.736246  |
| H | 3.594190  | -0.969587 | 0.825195  |
| H | -2.191823 | 0.138895  | 2.064874  |
| H | -1.191313 | -0.788880 | 3.200495  |
| H | -1.117424 | 0.996708  | 3.187533  |
| H | -1.416990 | 0.092683  | -0.219136 |
| C | 1.835561  | -0.019451 | 3.068961  |
| H | 1.670309  | 0.028440  | -2.202874 |
| O | 2.358232  | 0.038315  | -2.937598 |
| H | 1.987061  | -0.499003 | -3.652732 |
| H | 1.121284  | 0.042097  | 3.894170  |
| H | 2.419618  | -0.939679 | 3.199970  |
| H | 2.531079  | 0.824013  | 3.164830  |

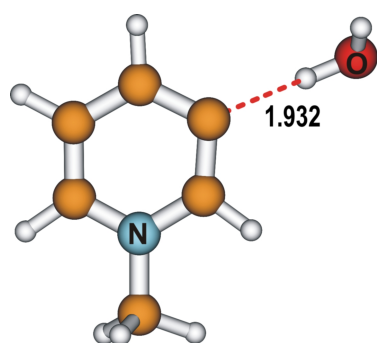

Relative stability compared to **5e**: 33.6 kcal mol<sup>-1</sup>

E(B3LYP/6-31+G\*)= -363.955075

|   |           |           |           |
|---|-----------|-----------|-----------|
| C | 0.046503  | 0.098245  | 0.003684  |
| C | 0.024082  | 0.112739  | 1.408167  |
| C | 1.219504  | 0.057064  | 2.101067  |
| N | 2.386011  | -0.011310 | 1.413528  |
| C | 2.380250  | -0.022943 | 0.040967  |
| C | 1.235859  | 0.030426  | -0.756388 |
| C | 3.654310  | -0.043092 | 2.163129  |
| H | 3.849975  | 0.936369  | 2.609474  |
| O | 1.628486  | -0.319369 | -3.644173 |
| H | 3.381027  | -0.085157 | -0.384649 |
| H | 1.494293  | -0.199885 | -2.657292 |
| H | -0.915262 | 0.137813  | -0.510474 |
| H | -0.905001 | 0.162793  | 1.971155  |
| H | 1.290945  | 0.062487  | 3.183233  |
| H | 4.463728  | -0.294881 | 1.477167  |
| H | 3.601333  | -0.800512 | 2.949123  |
| H | 1.248656  | 0.478355  | -4.041442 |

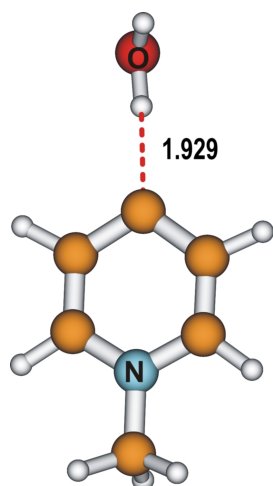

Relative stability compared to **5e**: 35.5 kcal mol<sup>-1</sup>

E(B3LYP/6-31+G\*)= -363.952121

|   |           |           |           |
|---|-----------|-----------|-----------|
| C | 0.000761  | -0.007419 | -0.003976 |
| C | -0.001405 | -0.006821 | 1.419733  |
| C | 1.315971  | -0.006827 | 1.958254  |
| C | 2.460573  | -0.010781 | 1.184367  |
| N | 2.377026  | -0.015180 | -0.174877 |
| C | 1.151216  | -0.010438 | -0.768756 |
| C | 3.596367  | 0.049273  | -0.992412 |
| H | 3.875598  | 1.091569  | -1.176903 |
| O | -2.567148 | 0.390002  | 2.779330  |
| H | 1.158366  | -0.009915 | -1.855728 |
| H | -0.943460 | -0.005772 | -0.548359 |
| H | -1.673916 | 0.230787  | 2.350047  |
| H | 1.464281  | -0.003863 | 3.038189  |
| H | 3.468614  | -0.010833 | 1.591072  |
| H | 3.420249  | -0.452823 | -1.945657 |
| H | 4.410342  | -0.456974 | -0.469936 |
| H | -2.790569 | -0.449693 | 3.207614  |
